# Supplementary material for: Natural variation in reproductive timing and X-chromosome nondisjunction in Caenorhabditis elegans
Source: G3 (Bethesda). 2021 Sep 22;11(12):jkab327. doi: 10.1093/g3journal/jkab327 (PMC8664432; doi:10.1093/g3journal/jkab327)
Supplement: jkab327_Supplementary_Data [file jkab327_supplementary_data.zip]

Archive with 10 entries (10 files):
- GENETICS-G3-2021-402755-s01.pdf
- GENETICS-G3-2021-402755-s02.pdf
- GENETICS-G3-2021-402755-s03.pdf
- GENETICS-G3-2021-402755-s04.pdf
- GENETICS-G3-2021-402755-s05.xlsx
- GENETICS-G3-2021-402755-s06.xlsx
- GENETICS-G3-2021-402755-s07.xlsx
- GENETICS-G3-2021-402755-s08.xlsx
- GENETICS-G3-2021-402755-s09.xlsx
- GENETICS-G3-2021-402755-s10.docx
