# Supplementary material for: Natural variation in reproductive timing and X-chromosome nondisjunction in Caenorhabditis elegans
Source: G3 (Bethesda). 2021 Sep 22;11(12):jkab327. doi: 10.1093/g3journal/jkab327 (PMC8664432; doi:10.1093/g3journal/jkab327)
Supplement: jkab327_Supplementary_Data [file jkab327_supplementary_data.zip › GENETICS-G3-2021-402755-s05.xlsx]

## Sheet: count
block	strain	early_male	early_broodsize	late_male	late_broodsize	total_male	total_broodsize
block1.1	CB4856	0	711	0	284	0	995
block1.1	CB4856	0	696	0	241	0	937
block1.1	CB4856	0	631	0	318	0	949
block1.1	CX11314	0	608	1	431	1	1039
block1.1	CX11314	0	618	0	442	0	1060
block1.1	CX11314	0	637	2	361	2	998
block1.1	DL238	3	582	0	209	3	791
block1.1	DL238	1	691	0	287	1	978
block1.1	DL238	0	598	0	211	0	809
block1.1	ED3017	0	601	0	366	0	967
block1.1	ED3017	0	491	0	300	0	791
block1.1	ED3017	0	585	0	343	0	928
block1.1	EG4725	0	681	0	474	0	1155
block1.1	EG4725	0	773	0	279	0	1052
block1.1	EG4725	0	729	0	524	0	1253
block1.1	JT11398	0	692	0	248	0	940
block1.1	JT11398	0	743	0	240	0	983
block1.1	JT11398	0	843	1	286	1	1129
block1.1	JU258	0	563	1	263	1	826
block1.1	JU258	0	704	0	178	0	882
block1.1	JU258	0	670	0	243	0	913
block1.1	LKC34	0	669	1	469	1	1138
block1.1	LKC34	0	712	1	446	1	1158
block1.1	LKC34	0	757	3	571	3	1328
block1.1	MY16	0	701	0	369	0	1070
block1.1	MY16	0	679	2	436	2	1115
block1.1	MY16	0	685	1	416	1	1101
block1.1	MY23	0	479	0	91	0	570
block1.1	MY23	2	507	2	253	4	760
block1.1	MY23	0	265	1	142	1	407
block1.2	CB4856	0	825	0	102	0	927
block1.2	CB4856	0	850	0	146	0	996
block1.2	CB4856	0	810	0	93	0	903
block1.2	CX11314	0	707	0	281	0	988
block1.2	CX11314	0	752	0	224	0	976
block1.2	CX11314	1	767	0	231	1	998
block1.2	DL238	0	763	0	119	0	882
block1.2	DL238	1	739	0	91	1	830
block1.2	DL238	1	756	1	84	2	840
block1.2	ED3017	0	728	0	253	0	981
block1.2	ED3017	0	791	0	247	0	1038
block1.2	ED3017	0	894	0	222	0	1116
block1.2	EG4725	0	813	0	370	0	1183
block1.2	EG4725	0	804	0	253	0	1057
block1.2	EG4725	0	807	0	290	0	1097
block1.2	JT11398	1	921	1	112	2	1033
block1.2	JT11398	0	803	0	134	0	937
block1.2	JT11398	0	953	0	107	0	1060
block1.2	JU258	0	649	0	64	0	713
block1.2	JU258	0	715	0	61	0	776
block1.2	JU258	1	716	0	110	1	826
block1.2	LKC34	1	922	5	307	6	1229
block1.2	LKC34	0	856	6	342	6	1198
block1.2	LKC34	1	836	2	320	3	1156
block1.2	MY16	1	827	0	122	1	949
block1.2	MY16	0	752	0	182	0	934
block1.2	MY16	0	870	1	219	1	1089
block1.2	MY23	1	517	0	39	1	556
block1.2	MY23	0	508	2	147	2	655
block1.2	MY23	0	330	0	52	0	382
block1.3	CB4856	0	572	0	302	0	874
block1.3	CB4856	0	618	0	194	0	812
block1.3	CB4856	0	510	0	267	0	777
block1.3	CX11314	0	591	0	312	0	903
block1.3	CX11314	0	650	0	369	0	1019
block1.3	CX11314	0	541	0	347	0	888
block1.3	DL238	0	513	0	203	0	716
block1.3	DL238	1	624	0	119	1	743
block1.3	DL238	1	565	0	163	1	728
block1.3	ED3017	0	554	0	244	0	798
block1.3	ED3017	0	506	0	312	0	818
block1.3	ED3017	0	532	1	359	1	891
block1.3	EG4725	0	661	2	346	2	1007
block1.3	EG4725	0	571	0	205	0	776
block1.3	EG4725	0	679	0	222	0	901
block1.3	JT11398	0	729	2	220	2	949
block1.3	JT11398	1	540	0	177	1	717
block1.3	JT11398	0	527	0	161	0	688
block1.3	JU258	0	511	0	120	0	631
block1.3	JU258	0	613	0	227	0	840
block1.3	JU258	0	574	0	198	0	772
block1.3	LKC34	2	701	0	241	2	942
block1.3	LKC34	0	625	1	344	1	969
block1.3	LKC34	0	704	0	264	0	968
block1.3	MY16	0	574	0	263	0	837
block1.3	MY16	1	799	1	134	2	933
block1.3	MY16	6	623	6	169	12	792
block1.3	MY23	1	533	0	100	1	633
block1.3	MY23	0	570	1	168	1	738
block1.3	MY23	0	460	1	84	1	544
block1.4	CB4856	0	541	0	379	0	920
block1.4	CB4856	0	577	0	302	0	879
block1.4	CB4856	1	528	0	312	1	840
block1.4	CX11314	0	570	0	410	0	980
block1.4	CX11314	0	533	0	441	0	974
block1.4	CX11314	0	569	0	325	0	894
block1.4	DL238	0	558	1	285	1	843
block1.4	DL238	0	548	0	312	0	860
block1.4	DL238	1	545	0	365	1	910
block1.4	ED3017	0	540	0	392	0	932
block1.4	ED3017	0	521	0	355	0	876
block1.4	ED3017	0	510	1	451	1	961
block1.4	EG4725	0	563	0	392	0	955
block1.4	EG4725	0	664	0	461	0	1125
block1.4	EG4725	0	620	0	403	0	1023
block1.4	JT11398	0	595	1	266	1	861
block1.4	JT11398	0	599	0	318	0	917
block1.4	JT11398	0	626	0	236	0	862
block1.4	JU258	0	538	0	322	0	860
block1.4	JU258	0	456	0	406	0	862
block1.4	JU258	0	435	1	342	1	777
block1.4	LKC34	0	680	1	361	1	1041
block1.4	LKC34	1	642	0	424	1	1066
block1.4	LKC34	0	559	1	366	1	925
block1.4	MY16	1	668	1	321	2	989
block1.4	MY16	0	733	0	153	0	886
block1.4	MY16	1	579	0	222	1	801
block1.4	MY23	1	459	0	144	1	603
block1.4	MY23	5	453	0	150	5	603
block1.4	MY23	0	564	0	141	0	705
block1.5	CB4856	0	421	2	322	2	743
block1.5	CB4856	0	462	1	369	1	831
block1.5	CB4856	1	440	0	451	1	891
block1.5	CX11314	0	356	0	306	0	662
block1.5	CX11314	0	479	0	581	0	1060
block1.5	CX11314	0	465	0	364	0	829
block1.5	DL238	0	548	1	391	1	939
block1.5	DL238	1	520	0	333	1	853
block1.5	DL238	0	571	1	355	1	926
block1.5	ED3017	0	334	0	438	0	772
block1.5	ED3017	0	465	0	513	0	978
block1.5	ED3017	0	424	0	374	0	798
block1.5	EG4725	0	498	0	707	0	1205
block1.5	EG4725	0	560	1	478	1	1038
block1.5	EG4725	0	525	0	482	0	1007
block1.5	JT11398	1	395	0	323	1	718
block1.5	JT11398	0	612	0	328	0	940
block1.5	JT11398	0	554	0	367	0	921
block1.5	JU258	0	495	0	367	0	862
block1.5	JU258	0	411	0	376	0	787
block1.5	JU258	1	445	0	349	1	794
block1.5	LKC34	0	513	0	446	0	959
block1.5	LKC34	0	531	0	717	0	1248
block1.5	LKC34	0	537	0	669	0	1206
block1.5	MY16	0	701	0	376	0	1077
block1.5	MY16	0	587	0	342	0	929
block1.5	MY16	0	518	0	438	0	956
block1.5	MY23	0	477	0	228	0	705
block1.5	MY23	0	403	1	195	1	598
block1.5	MY23	0	472	0	284	0	756
block2.1	CB4856	0	575	0	128	0	703
block2.1	CB4856	0	617	0	140	0	757
block2.1	CB4856	0	592	0	178	0	770
block2.1	BRC20067	0	604	0	323	0	927
block2.1	BRC20067	1	800	2	249	3	1049
block2.1	BRC20067	0	701	0	308	0	1009
block2.1	CX11276	1	729	1	356	2	1085
block2.1	CX11276	1	681	1	382	2	1063
block2.1	CX11276	0	690	1	289	1	979
block2.1	CX11285	1	502	0	97	1	599
block2.1	CX11285	4	618	0	79	4	697
block2.1	CX11285	1	632	2	199	3	831
block2.1	ECA36	16	201	2	36	18	237
block2.1	ECA36	6	170	1	7	7	177
block2.1	ECA36	10	107	0	0	10	107
block2.1	ED3040	0	755	4	346	4	1101
block2.1	ED3040	0	709	0	530	0	1239
block2.1	ED3040	0	602	0	454	0	1056
block2.1	JU1088	0	675	1	66	1	741
block2.1	JU1088	0	835	0	107	0	942
block2.1	JU1088	0	692	0	125	0	817
block2.1	JU1242	0	479	0	243	0	722
block2.1	JU1242	0	637	0	266	0	903
block2.1	JU1242	0	560	0	202	0	762
block2.1	JU1409	0	650	1	163	1	813
block2.1	JU1409	0	650	0	169	0	819
block2.1	JU1409	0	616	0	291	0	907
block2.1	JU1581	0	463	1	295	1	758
block2.1	JU1581	0	375	0	262	0	637
block2.1	JU1581	0	452	0	284	0	736
block2.1	JU2007	0	507	0	243	0	750
block2.1	JU2007	0	375	0	130	0	505
block2.1	JU2007	0	785	0	392	0	1177
block2.1	JU311	0	756	0	109	0	865
block2.1	JU311	0	627	0	81	0	708
block2.1	JU311	0	679	0	198	0	877
block2.1	JU323	1	784	0	198	1	982
block2.1	JU323	5	758	0	156	5	914
block2.1	JU323	4	892	0	57	4	949
block2.1	JU440	0	753	1	222	1	975
block2.1	JU440	0	699	0	397	0	1096
block2.1	JU440	0	771	0	267	0	1038
block2.1	JU774	0	651	2	266	2	917
block2.1	JU774	2	717	3	279	5	996
block2.1	JU774	0	726	1	217	1	943
block2.1	MY1	0	665	0	305	0	970
block2.1	MY1	0	740	1	316	1	1056
block2.1	MY1	0	813	0	299	0	1112
block2.1	NIC274	0	611	0	248	0	859
block2.1	NIC274	0	644	0	109	0	753
block2.1	NIC274	0	616	0	154	0	770
block2.1	PB303	0	732	0	272	0	1004
block2.1	PB303	1	757	1	212	2	969
block2.1	PB303	0	733	1	395	1	1128
block2.1	QG2075	1	506	0	244	1	750
block2.1	QG2075	0	463	0	152	0	615
block2.1	QG2075	1	498	0	131	1	629
block2.2	CB4856	0	656	0	93	0	749
block2.2	CB4856	1	659	0	109	1	768
block2.2	CB4856	1	554	0	185	1	739
block2.2	BRC20067	1	473	0	168	1	641
block2.2	BRC20067	0	853	0	106	0	959
block2.2	BRC20067	0	602	0	170	0	772
block2.2	CX11276	0	799	1	273	1	1072
block2.2	CX11276	0	733	0	377	0	1110
block2.2	CX11276	1	568	1	345	2	913
block2.2	CX11285	0	560	0	60	0	620
block2.2	CX11285	0	599	0	25	0	624
block2.2	CX11285	0	463	0	49	0	512
block2.2	ECA36	7	290	2	40	9	330
block2.2	ECA36	21	196	1	57	22	253
block2.2	ECA36	17	160	0	3	17	163
block2.2	ED3040	2	949	0	283	2	1232
block2.2	ED3040	0	830	0	287	0	1117
block2.2	ED3040	0	811	0	323	0	1134
block2.2	JU1088	0	803	0	71	0	874
block2.2	JU1088	0	763	0	117	0	880
block2.2	JU1088	0	684	0	115	0	799
block2.2	JU1242	0	714	0	156	0	870
block2.2	JU1242	0	691	0	343	0	1034
block2.2	JU1242	1	718	0	228	1	946
block2.2	JU1409	0	661	1	194	1	855
block2.2	JU1409	1	696	0	68	1	764
block2.2	JU1409	0	668	1	155	1	823
block2.2	JU1581	0	576	0	173	0	749
block2.2	JU1581	1	530	0	248	1	778
block2.2	JU1581	0	498	0	209	0	707
block2.2	JU2007	0	825	0	208	0	1033
block2.2	JU2007	0	832	2	146	2	978
block2.2	JU2007	0	836	0	257	0	1093
block2.2	JU311	0	852	0	143	0	995
block2.2	JU311	0	777	0	213	0	990
block2.2	JU311	0	703	0	142	0	845
block2.2	JU323	0	843	0	24	0	867
block2.2	JU323	0	877	0	83	0	960
block2.2	JU323	2	814	0	4	2	818
block2.2	JU440	0	729	0	455	0	1184
block2.2	JU440	0	827	0	280	0	1107
block2.2	JU440	0	740	0	295	0	1035
block2.2	JU774	0	717	1	197	1	914
block2.2	JU774	1	782	0	121	1	903
block2.2	JU774	0	832	1	123	1	955
block2.2	MY1	0	791	0	216	0	1007
block2.2	MY1	0	776	0	178	0	954
block2.2	MY1	0	864	0	186	0	1050
block2.2	NIC274	0	762	0	54	0	816
block2.2	NIC274	0	658	0	62	0	720
block2.2	NIC274	2	617	0	97	2	714
block2.2	PB303	1	642	0	318	1	960
block2.2	PB303	0	792	0	125	0	917
block2.2	PB303	1	853	1	274	2	1127
block2.2	QG2075	2	571	0	103	2	674
block2.2	QG2075	0	480	1	82	1	562
block2.2	QG2075	0	536	0	59	0	595
block2.3	CB4856	0	532	0	324	0	856
block2.3	CB4856	0	474	0	452	0	926
block2.3	CB4856	1	467	1	359	2	826
block2.3	BRC20067	0	557	1	384	1	941
block2.3	BRC20067	0	517	0	516	0	1033
block2.3	BRC20067	0	532	0	448	0	980
block2.3	CX11276	0	448	0	343	0	791
block2.3	CX11276	0	538	0	440	0	978
block2.3	CX11276	0	488	0	378	0	866
block2.3	CX11285	0	426	1	156	1	582
block2.3	CX11285	0	436	0	183	0	619
block2.3	CX11285	0	497	0	229	0	726
block2.3	ECA36	13	177	1	59	14	236
block2.3	ECA36	11	149	3	41	14	190
block2.3	ECA36	0	1	0	0	0	1
block2.3	ED3040	0	684	0	468	0	1152
block2.3	ED3040	0	671	1	494	1	1165
block2.3	ED3040	0	706	0	538	0	1244
block2.3	JU1088	0	615	0	262	0	877
block2.3	JU1088	0	558	0	269	0	827
block2.3	JU1088	0	637	0	219	0	856
block2.3	JU1242	0	459	0	304	0	763
block2.3	JU1242	0	511	0	254	0	765
block2.3	JU1242	1	403	1	311	2	714
block2.3	JU1409	0	568	0	376	0	944
block2.3	JU1409	0	490	0	375	0	865
block2.3	JU1409	0	448	0	274	0	722
block2.3	JU1581	0	367	0	474	0	841
block2.3	JU1581	0	403	0	446	0	849
block2.3	JU1581	0	452	2	432	2	884
block2.3	JU2007	0	549	0	454	0	1003
block2.3	JU2007	0	593	0	332	0	925
block2.3	JU2007	1	434	0	146	1	580
block2.3	JU311	0	546	0	212	0	758
block2.3	JU311	0	470	0	170	0	640
block2.3	JU311	0	598	0	216	0	814
block2.3	JU323	0	731	0	160	0	891
block2.3	JU323	0	664	0	230	0	894
block2.3	JU323	1	694	0	266	1	960
block2.3	JU440	0	531	0	383	0	914
block2.3	JU440	1	380	0	537	1	917
block2.3	JU440	0	494	2	596	2	1090
block2.3	JU774	0	559	0	334	0	893
block2.3	JU774	0	545	0	435	0	980
block2.3	JU774	0	497	0	319	0	816
block2.3	MY1	0	607	1	293	1	900
block2.3	MY1	0	561	0	277	0	838
block2.3	MY1	0	612	0	308	0	920
block2.3	NIC274	0	514	0	258	0	772
block2.3	NIC274	0	592	0	203	0	795
block2.3	NIC274	0	552	0	243	0	795
block2.3	PB303	0	581	0	234	0	815
block2.3	PB303	0	526	0	422	0	948
block2.3	PB303	0	566	2	418	2	984
block2.3	QG2075	0	456	0	258	0	714
block2.3	QG2075	2	338	0	143	2	481
block2.3	QG2075	0	409	0	155	0	564
block2.4	CB4856	0	431	0	285	0	716
block2.4	CB4856	0	414	0	315	0	729
block2.4	CB4856	0	417	1	277	1	694
block2.4	BRC20067	0	356	0	326	0	682
block2.4	BRC20067	0	493	0	336	0	829
block2.4	BRC20067	0	358	0	534	0	892
block2.4	CX11276	0	560	0	479	0	1039
block2.4	CX11276	0	505	0	509	0	1014
block2.4	CX11276	0	517	0	486	0	1003
block2.4	CX11285	1	525	0	331	1	856
block2.4	CX11285	0	594	0	163	0	757
block2.4	CX11285	0	489	1	306	1	795
block2.4	ECA36	0	21	0	1	0	22
block2.4	ECA36	10	129	2	36	12	165
block2.4	ECA36	2	82	2	20	4	102
block2.4	ED3040	0	675	1	444	1	1119
block2.4	ED3040	0	599	0	538	0	1137
block2.4	ED3040	0	559	1	643	1	1202
block2.4	JU1088	0	614	0	194	0	808
block2.4	JU1088	0	636	0	168	0	804
block2.4	JU1088	0	701	0	222	0	923
block2.4	JU1242	0	493	0	374	0	867
block2.4	JU1242	0	399	1	474	1	873
block2.4	JU1242	0	603	0	272	0	875
block2.4	JU1409	0	540	0	342	0	882
block2.4	JU1409	0	572	0	374	0	946
block2.4	JU1409	1	550	2	422	3	972
block2.4	JU1581	0	440	0	223	0	663
block2.4	JU1581	0	376	0	246	0	622
block2.4	JU1581	0	360	0	410	0	770
block2.4	JU2007	0	691	0	535	0	1226
block2.4	JU2007	0	757	2	438	2	1195
block2.4	JU2007	0	706	0	528	0	1234
block2.4	JU311	0	787	0	229	0	1016
block2.4	JU311	0	558	0	296	0	854
block2.4	JU311	0	698	0	218	0	916
block2.4	JU323	3	683	1	240	4	923
block2.4	JU323	0	534	0	218	0	752
block2.4	JU323	3	763	1	97	4	860
block2.4	JU440	0	516	0	553	0	1069
block2.4	JU440	0	571	0	498	0	1069
block2.4	JU440	0	561	0	662	0	1223
block2.4	JU774	0	636	0	461	0	1097
block2.4	JU774	0	720	0	446	0	1166
block2.4	JU774	2	641	0	273	2	914
block2.4	MY1	0	631	0	376	0	1007
block2.4	MY1	0	537	1	425	1	962
block2.4	MY1	0	578	2	542	2	1120
block2.4	NIC274	0	446	1	313	1	759
block2.4	NIC274	0	474	0	473	0	947
block2.4	NIC274	0	485	0	340	0	825
block2.4	PB303	0	705	0	471	0	1176
block2.4	PB303	0	731	1	360	1	1091
block2.4	PB303	0	703	0	474	0	1177
block2.4	QG2075	0	499	0	240	0	739
block2.4	QG2075	1	516	0	238	1	754
block2.4	QG2075	0	490	1	355	1	845
block2.5	CB4856	0	436	0	349	0	785
block2.5	CB4856	0	413	1	309	1	722
block2.5	CB4856	0	377	0	299	0	676
block2.5	BRC20067	0	337	0	391	0	728
block2.5	BRC20067	0	332	0	292	0	624
block2.5	BRC20067	0	431	0	482	0	913
block2.5	CX11276	0	513	0	593	0	1106
block2.5	CX11276	0	452	0	625	0	1077
block2.5	CX11276	0	443	0	485	0	928
block2.5	CX11285	0	420	1	170	1	590
block2.5	CX11285	0	394	0	237	0	631
block2.5	CX11285	0	357	0	129	0	486
block2.5	ECA36	2	33	0	2	2	35
block2.5	ECA36	13	240	4	59	17	299
block2.5	ECA36	2	110	2	66	4	176
block2.5	ED3040	0	623	0	348	0	971
block2.5	ED3040	0	626	1	566	1	1192
block2.5	ED3040	0	668	0	399	0	1067
block2.5	JU1088	0	615	0	249	0	864
block2.5	JU1088	0	529	0	281	0	810
block2.5	JU1088	0	606	0	306	0	912
block2.5	JU1242	1	611	0	395	1	1006
block2.5	JU1242	0	446	0	429	0	875
block2.5	JU1242	0	413	0	349	0	762
block2.5	JU1409	0	571	0	309	0	880
block2.5	JU1409	1	540	0	451	1	991
block2.5	JU1409	0	444	0	442	0	886
block2.5	JU1581	0	373	0	332	0	705
block2.5	JU1581	0	313	0	488	0	801
block2.5	JU1581	0	561	0	549	0	1110
block2.5	JU2007	0	541	0	487	0	1028
block2.5	JU2007	0	417	1	308	1	725
block2.5	JU2007	0	590	0	400	0	990
block2.5	JU311	0	690	0	295	0	985
block2.5	JU311	0	613	0	274	0	887
block2.5	JU311	0	641	0	204	0	845
block2.5	JU323	1	724	2	278	3	1002
block2.5	JU323	1	583	0	201	1	784
block2.5	JU323	1	652	2	146	3	798
block2.5	JU440	0	501	0	506	0	1007
block2.5	JU440	0	357	0	375	0	732
block2.5	JU440	1	571	1	572	2	1143
block2.5	JU774	0	511	1	447	1	958
block2.5	JU774	0	554	0	377	0	931
block2.5	JU774	0	563	0	381	0	944
block2.5	MY1	0	545	0	340	0	885
block2.5	MY1	0	507	0	481	0	988
block2.5	MY1	0	603	0	617	0	1220
block2.5	NIC274	0	391	0	227	0	618
block2.5	NIC274	0	406	0	136	0	542
block2.5	NIC274	0	472	0	194	0	666
block2.5	PB303	1	522	0	478	1	1000
block2.5	PB303	0	590	0	487	0	1077
block2.5	PB303	0	607	1	395	1	1002
block2.5	QG2075	0	226	0	135	0	361
block2.5	QG2075	1	452	0	295	1	747
block2.5	QG2075	0	292	0	135	0	427
block3.1	CB4856	0	668	0	175	0	843
block3.1	CB4856	0	567	1	276	1	843
block3.1	CB4856	0	550	1	338	1	888
block3.1	ED3052	0	669	0	312	0	981
block3.1	ED3052	1	624	0	422	1	1046
block3.1	ED3052	0	588	0	275	0	863
block3.1	JU1213	1	554	1	413	2	967
block3.1	JU1213	0	661	2	344	2	1005
block3.1	JU1213	2	571	0	319	2	890
block3.1	JU1440	0	550	0	325	0	875
block3.1	JU1440	0	569	1	257	1	826
block3.1	JU1440	0	475	0	433	0	908
block3.1	JU1568	0	633	0	538	0	1171
block3.1	JU1568	0	673	0	448	0	1121
block3.1	JU1568	0	705	1	505	1	1210
block3.1	JU2466	0	566	0	418	0	984
block3.1	JU2466	1	500	2	442	3	942
block3.1	JU2466	1	398	0	514	1	912
block3.1	JU2519	1	694	0	100	1	794
block3.1	JU2519	4	708	0	163	4	871
block3.1	JU2519	0	712	0	140	0	852
block3.1	JU346	0	655	0	612	0	1267
block3.1	JU346	0	648	0	732	0	1380
block3.1	JU346	0	642	0	807	0	1449
block3.1	JU830	0	432	0	369	0	801
block3.1	JU830	0	498	0	376	0	874
block3.1	JU830	0	488	0	340	0	828
block3.1	NIC1	0	688	0	464	0	1152
block3.1	NIC1	0	706	0	400	0	1106
block3.1	NIC1	0	760	0	483	0	1243
block3.1	NIC199	0	568	1	332	1	900
block3.1	NIC199	1	658	0	307	1	965
block3.1	NIC199	0	611	0	363	0	974
block3.1	NIC2	0	640	0	363	0	1003
block3.1	NIC2	0	727	1	410	1	1137
block3.1	NIC2	0	681	0	478	0	1159
block3.1	NIC252	0	545	0	345	0	890
block3.1	NIC252	0	594	1	234	1	828
block3.1	NIC252	0	597	0	285	0	882
block3.1	NIC256	0	569	0	327	0	896
block3.1	NIC256	0	510	0	174	0	684
block3.1	NIC256	0	524	1	296	1	820
block3.1	NIC261	0	366	1	297	1	663
block3.1	NIC261	0	378	0	382	0	760
block3.1	NIC261	1	300	2	322	3	622
block3.1	NIC277	1	628	0	163	1	791
block3.1	NIC277	0	583	0	163	0	746
block3.1	NIC277	0	608	1	321	1	929
block3.1	NIC3	0	624	1	405	1	1029
block3.1	NIC3	0	532	0	306	0	838
block3.1	NIC3	0	749	0	415	0	1164
block3.1	QX1794	0	591	0	23	0	614
block3.1	QX1794	0	581	0	21	0	602
block3.1	QX1794	1	556	0	51	1	607
block3.2	CB4856	0	457	0	365	0	822
block3.2	CB4856	2	390	0	278	2	668
block3.2	CB4856	0	532	0	330	0	862
block3.2	ED3052	0	478	1	455	1	933
block3.2	ED3052	0	295	0	208	0	503
block3.2	ED3052	0	351	1	567	1	918
block3.2	JU1213	1	431	2	422	3	853
block3.2	JU1213	0	489	2	431	2	920
block3.2	JU1213	0	434	3	544	3	978
block3.2	JU1440	0	388	0	388	0	776
block3.2	JU1440	0	336	0	316	0	652
block3.2	JU1440	1	421	1	460	2	881
block3.2	JU1568	0	500	1	431	1	931
block3.2	JU1568	0	514	0	370	0	884
block3.2	JU1568	0	552	5	411	5	963
block3.2	JU2466	0	367	0	646	0	1013
block3.2	JU2466	1	353	0	468	1	821
block3.2	JU2466	1	365	1	481	2	846
block3.2	JU2519	0	546	0	250	0	796
block3.2	JU2519	0	434	0	305	0	739
block3.2	JU2519	0	499	0	310	0	809
block3.2	JU346	0	515	0	567	0	1082
block3.2	JU346	0	349	0	598	0	947
block3.2	JU346	0	553	0	580	0	1133
block3.2	JU830	0	404	0	371	0	775
block3.2	JU830	0	371	0	413	0	784
block3.2	JU830	0	488	0	345	0	833
block3.2	NIC1	0	567	0	559	0	1126
block3.2	NIC1	0	624	0	503	0	1127
block3.2	NIC1	0	572	1	525	1	1097
block3.2	NIC199	1	448	0	606	1	1054
block3.2	NIC199	0	489	1	568	1	1057
block3.2	NIC199	1	475	0	654	1	1129
block3.2	NIC2	0	540	0	545	0	1085
block3.2	NIC2	0	567	1	535	1	1102
block3.2	NIC2	0	524	0	567	0	1091
block3.2	NIC252	0	446	1	423	1	869
block3.2	NIC252	0	444	0	352	0	796
block3.2	NIC252	0	430	0	344	0	774
block3.2	NIC256	0	235	2	365	2	600
block3.2	NIC256	0	481	1	518	1	999
block3.2	NIC256	0	440	2	499	2	939
block3.2	NIC261	0	220	3	513	3	733
block3.2	NIC261	2	280	0	478	2	758
block3.2	NIC261	1	141	1	326	2	467
block3.2	NIC277	0	577	0	377	0	954
block3.2	NIC277	0	538	0	415	0	953
block3.2	NIC277	0	588	2	511	2	1099
block3.2	NIC3	0	453	1	485	1	938
block3.2	NIC3	0	450	0	455	0	905
block3.2	NIC3	0	531	1	418	1	949
block3.2	QX1794	0	615	0	105	0	720
block3.2	QX1794	0	531	0	103	0	634
block3.2	QX1794	0	628	0	118	0	746
block3.3	CB4856	0	590	0	334	0	924
block3.3	CB4856	0	525	0	421	0	946
block3.3	CB4856	0	450	0	412	0	862
block3.3	ED3052	1	449	0	577	1	1026
block3.3	ED3052	1	548	0	386	1	934
block3.3	ED3052	1	526	1	620	2	1146
block3.3	JU1213	0	499	0	488	0	987
block3.3	JU1213	0	514	1	483	1	997
block3.3	JU1213	2	602	0	421	2	1023
block3.3	JU1440	0	456	0	468	0	924
block3.3	JU1440	0	475	0	416	0	891
block3.3	JU1440	0	483	0	498	0	981
block3.3	JU1568	0	554	0	634	0	1188
block3.3	JU1568	0	562	0	626	0	1188
block3.3	JU1568	0	639	0	626	0	1265
block3.3	JU2466	0	300	0	483	0	783
block3.3	JU2466	0	470	0	442	0	912
block3.3	JU2466	0	329	1	429	1	758
block3.3	JU2519	0	691	1	144	1	835
block3.3	JU2519	0	553	1	234	1	787
block3.3	JU2519	0	571	0	133	0	704
block3.3	JU346	0	546	0	556	0	1102
block3.3	JU346	0	638	1	509	1	1147
block3.3	JU346	0	450	0	504	0	954
block3.3	JU830	0	381	0	277	0	658
block3.3	JU830	0	405	0	319	0	724
block3.3	JU830	0	432	0	250	0	682
block3.3	NIC1	0	728	1	452	1	1180
block3.3	NIC1	1	658	1	466	2	1124
block3.3	NIC1	0	745	0	370	0	1115
block3.3	NIC199	0	599	2	264	2	863
block3.3	NIC199	0	493	0	365	0	858
block3.3	NIC199	0	545	4	398	4	943
block3.3	NIC2	0	677	1	550	1	1227
block3.3	NIC2	0	671	0	589	0	1260
block3.3	NIC2	0	697	1	306	1	1003
block3.3	NIC252	0	452	0	416	0	868
block3.3	NIC252	0	522	0	287	0	809
block3.3	NIC252	1	565	0	300	1	865
block3.3	NIC256	0	539	1	271	1	810
block3.3	NIC256	1	592	0	475	1	1067
block3.3	NIC256	0	558	0	432	0	990
block3.3	NIC261	0	284	0	449	0	733
block3.3	NIC261	0	281	0	610	0	891
block3.3	NIC261	0	312	0	595	0	907
block3.3	NIC277	0	607	0	211	0	818
block3.3	NIC277	1	616	0	260	1	876
block3.3	NIC277	0	637	0	158	0	795
block3.3	NIC3	0	552	0	346	0	898
block3.3	NIC3	0	538	0	420	0	958
block3.3	NIC3	0	614	0	415	0	1029
block3.3	QX1794	1	421	0	30	1	451
block3.3	QX1794	1	690	0	61	1	751
block3.3	QX1794	1	573	0	87	1	660
block3.4	CB4856	0	482	0	379	0	861
block3.4	CB4856	0	429	0	378	0	807
block3.4	CB4856	0	452	0	376	0	828
block3.4	ED3052	2	481	1	488	3	969
block3.4	ED3052	0	399	0	494	0	893
block3.4	ED3052	0	370	0	636	0	1006
block3.4	JU1213	0	442	1	663	1	1105
block3.4	JU1213	0	425	1	654	1	1079
block3.4	JU1213	0	444	4	753	4	1197
block3.4	JU1440	0	410	0	545	0	955
block3.4	JU1440	0	447	0	487	0	934
block3.4	JU1440	0	491	0	628	0	1119
block3.4	JU1568	0	558	1	628	1	1186
block3.4	JU1568	0	514	0	485	0	999
block3.4	JU1568	0	491	1	563	1	1054
block3.4	JU2466	0	367	1	653	1	1020
block3.4	JU2466	0	484	1	558	1	1042
block3.4	JU2466	0	496	1	813	1	1309
block3.4	JU2519	1	538	2	258	3	796
block3.4	JU2519	0	499	1	301	1	800
block3.4	JU2519	1	536	0	334	1	870
block3.4	JU346	0	547	0	774	0	1321
block3.4	JU346	1	539	0	694	1	1233
block3.4	JU346	0	374	0	533	0	907
block3.4	JU830	0	403	0	331	0	734
block3.4	JU830	0	505	0	379	0	884
block3.4	JU830	0	425	1	394	1	819
block3.4	NIC1	0	539	1	636	1	1175
block3.4	NIC1	0	609	3	524	3	1133
block3.4	NIC1	1	610	0	601	1	1211
block3.4	NIC199	2	522	0	401	2	923
block3.4	NIC199	0	500	1	415	1	915
block3.4	NIC199	0	529	0	464	0	993
block3.4	NIC2	1	582	0	543	1	1125
block3.4	NIC2	0	560	0	498	0	1058
block3.4	NIC2	1	540	0	723	1	1263
block3.4	NIC252	0	570	0	272	0	842
block3.4	NIC252	0	487	0	397	0	884
block3.4	NIC252	1	595	1	362	2	957
block3.4	NIC256	0	473	0	559	0	1032
block3.4	NIC256	0	453	1	480	1	933
block3.4	NIC256	2	619	2	407	4	1026
block3.4	NIC261	0	196	0	242	0	438
block3.4	NIC261	0	296	0	264	0	560
block3.4	NIC261	0	240	0	301	0	541
block3.4	NIC277	0	479	1	548	1	1027
block3.4	NIC277	0	553	0	534	0	1087
block3.4	NIC277	1	616	1	532	2	1148
block3.4	NIC3	0	541	0	546	0	1087
block3.4	NIC3	1	543	1	513	2	1056
block3.4	NIC3	1	572	1	457	2	1029
block3.4	QX1794	1	607	0	200	1	807
block3.4	QX1794	0	598	0	175	0	773
block3.4	QX1794	0	648	1	177	1	825
block3.5	CB4856	0	491	0	419	0	910
block3.5	CB4856	0	459	0	421	0	880
block3.5	CB4856	0	449	0	383	0	832
block3.5	ED3052	0	484	1	542	1	1026
block3.5	ED3052	0	469	1	576	1	1045
block3.5	ED3052	0	586	0	421	0	1007
block3.5	JU1213	0	447	0	669	0	1116
block3.5	JU1213	1	502	0	460	1	962
block3.5	JU1213	1	517	3	416	4	933
block3.5	JU1440	0	477	0	524	0	1001
block3.5	JU1440	0	574	0	432	0	1006
block3.5	JU1440	0	488	0	447	0	935
block3.5	JU1568	0	576	0	789	0	1365
block3.5	JU1568	0	519	1	495	1	1014
block3.5	JU1568	0	649	0	554	0	1203
block3.5	JU2466	0	378	0	744	0	1122
block3.5	JU2466	0	460	1	674	1	1134
block3.5	JU2466	0	499	0	655	0	1154
block3.5	JU2519	1	514	2	282	3	796
block3.5	JU2519	1	639	1	274	2	913
block3.5	JU2519	0	567	2	375	2	942
block3.5	JU346	1	578	0	688	1	1266
block3.5	JU346	0	556	1	690	1	1246
block3.5	JU346	0	507	0	433	0	940
block3.5	JU830	0	281	0	315	0	596
block3.5	JU830	0	310	0	308	0	618
block3.5	JU830	0	321	0	248	0	569
block3.5	NIC1	0	419	1	527	1	946
block3.5	NIC1	0	616	0	429	0	1045
block3.5	NIC1	0	594	2	467	2	1061
block3.5	NIC199	1	598	0	411	1	1009
block3.5	NIC199	1	563	2	415	3	978
block3.5	NIC199	0	486	2	475	2	961
block3.5	NIC2	1	296	0	244	1	540
block3.5	NIC2	0	570	0	532	0	1102
block3.5	NIC2	0	623	1	553	1	1176
block3.5	NIC252	1	506	2	323	3	829
block3.5	NIC252	0	515	0	337	0	852
block3.5	NIC252	0	520	1	504	1	1024
block3.5	NIC256	2	492	3	357	5	849
block3.5	NIC256	0	463	0	298	0	761
block3.5	NIC256	2	546	2	254	4	800
block3.5	NIC261	0	181	1	239	1	420
block3.5	NIC261	0	175	0	281	0	456
block3.5	NIC261	0	199	0	439	0	638
block3.5	NIC277	2	586	0	399	2	985
block3.5	NIC277	1	571	2	275	3	846
block3.5	NIC277	0	582	1	360	1	942
block3.5	NIC3	0	619	0	507	0	1126
block3.5	NIC3	2	600	0	443	2	1043
block3.5	NIC3	0	603	0	533	0	1136
block3.5	QX1794	0	612	0	122	0	734
block3.5	QX1794	0	613	1	175	1	788
block3.5	QX1794	1	576	0	155	1	731
block4.1	CB4856	0	265	0	469	0	734
block4.1	CB4856	0	382	0	500	0	882
block4.1	CB4856	0	402	0	492	0	894
block4.1	AB1	0	567	0	346	0	913
block4.1	AB1	0	556	1	320	1	876
block4.1	AB1	0	380	1	299	1	679
block4.1	CX11271	0	417	0	346	0	763
block4.1	CX11271	1	477	0	460	1	937
block4.1	CX11271	0	538	1	373	1	911
block4.1	DL200	0	480	1	489	1	969
block4.1	DL200	0	511	0	512	0	1023
block4.1	DL200	0	481	0	337	0	818
block4.1	DL226	0	492	0	135	0	627
block4.1	DL226	1	493	0	296	1	789
block4.1	DL226	0	435	0	323	0	758
block4.1	ED3046	0	348	0	96	0	444
block4.1	ED3046	0	482	0	203	0	685
block4.1	ED3046	0	425	0	205	0	630
block4.1	ED3049	0	476	0	219	0	695
block4.1	ED3049	0	451	1	248	1	699
block4.1	ED3049	0	469	0	274	0	743
block4.1	JU1172	0	339	0	249	0	588
block4.1	JU1172	0	372	1	343	1	715
block4.1	JU1172	1	419	0	343	1	762
block4.1	JU1200	1	574	0	486	1	1060
block4.1	JU1200	0	554	0	291	0	845
block4.1	JU1200	0	562	0	321	0	883
block4.1	JU847	3	445	2	262	5	707
block4.1	JU847	0	511	0	246	0	757
block4.1	JU847	0	491	0	301	0	792
block4.1	NIC242	0	383	0	327	0	710
block4.1	NIC242	0	594	0	311	0	905
block4.1	NIC242	0	390	0	230	0	620
block4.1	NIC260	2	579	3	380	5	959
block4.1	NIC260	5	589	1	374	6	963
block4.1	NIC260	2	619	8	502	10	1121
block4.1	NIC266	0	468	0	423	0	891
block4.1	NIC266	0	358	0	483	0	841
block4.1	NIC266	0	468	2	373	2	841
block4.1	NIC272	2	559	0	342	2	901
block4.1	NIC272	2	479	0	361	2	840
block4.1	NIC272	0	493	0	302	0	795
block4.1	NIC276	0	614	1	405	1	1019
block4.1	NIC276	0	83	0	105	0	188
block4.1	NIC276	1	476	0	199	1	675
block4.1	PX179	0	536	0	412	0	948
block4.1	PX179	0	483	1	340	1	823
block4.1	PX179	0	569	0	551	0	1120
block4.1	QG557	0	577	0	379	0	956
block4.1	QG557	0	449	1	326	1	775
block4.1	QG557	0	528	0	332	0	860
block4.2	CB4856	0	474	0	458	0	932
block4.2	CB4856	1	381	0	418	1	799
block4.2	CB4856	0	425	2	446	2	871
block4.2	AB1	1	614	1	209	2	823
block4.2	AB1	0	449	1	166	1	615
block4.2	AB1	0	525	2	177	2	702
block4.2	CX11271	0	538	0	536	0	1074
block4.2	CX11271	0	613	0	345	0	958
block4.2	CX11271	0	493	0	469	0	962
block4.2	DL200	0	586	0	387	0	973
block4.2	DL200	0	579	1	536	1	1115
block4.2	DL200	0	546	0	495	0	1041
block4.2	DL226	1	581	1	333	2	914
block4.2	DL226	0	554	0	416	0	970
block4.2	DL226	0	493	0	286	0	779
block4.2	ED3046	0	518	0	270	0	788
block4.2	ED3046	0	452	0	212	0	664
block4.2	ED3046	0	452	0	169	0	621
block4.2	ED3049	0	318	0	181	0	499
block4.2	ED3049	0	445	0	279	0	724
block4.2	ED3049	0	519	0	224	0	743
block4.2	JU1172	1	430	1	246	2	676
block4.2	JU1172	0	397	0	321	0	718
block4.2	JU1172	0	412	1	243	1	655
block4.2	JU1200	0	450	0	575	0	1025
block4.2	JU1200	0	444	0	246	0	690
block4.2	JU1200	0	580	0	374	0	954
block4.2	JU847	0	542	0	233	0	775
block4.2	JU847	0	473	0	298	0	771
block4.2	JU847	0	480	0	235	0	715
block4.2	NIC242	0	415	1	280	1	695
block4.2	NIC242	0	437	0	269	0	706
block4.2	NIC242	0	459	1	346	1	805
block4.2	NIC260	2	523	6	383	8	906
block4.2	NIC260	1	509	0	436	1	945
block4.2	NIC260	2	517	5	320	7	837
block4.2	NIC266	0	258	0	246	0	504
block4.2	NIC266	1	518	2	396	3	914
block4.2	NIC266	1	323	1	207	2	530
block4.2	NIC272	0	441	0	310	0	751
block4.2	NIC272	0	349	0	329	0	678
block4.2	NIC272	0	539	0	270	0	809
block4.2	NIC276	0	582	0	303	0	885
block4.2	NIC276	0	543	0	403	0	946
block4.2	NIC276	0	440	0	181	0	621
block4.2	PX179	0	467	0	289	0	756
block4.2	PX179	0	619	0	298	0	917
block4.2	PX179	0	576	1	385	1	961
block4.2	QG557	0	655	0	255	0	910
block4.2	QG557	1	644	0	209	1	853
block4.2	QG557	1	560	1	260	2	820
block4.3	CB4856	2	553	0	390	2	943
block4.3	CB4856	0	431	0	239	0	670
block4.3	CB4856	0	644	0	407	0	1051
block4.3	AB1	0	647	0	398	0	1045
block4.3	AB1	0	570	1	481	1	1051
block4.3	AB1	0	750	0	370	0	1120
block4.3	CX11271	0	614	0	579	0	1193
block4.3	CX11271	0	696	0	482	0	1178
block4.3	CX11271	0	602	1	555	1	1157
block4.3	DL200	0	622	1	639	1	1261
block4.3	DL200	0	591	2	759	2	1350
block4.3	DL200	0	726	0	578	0	1304
block4.3	DL226	1	584	1	525	2	1109
block4.3	DL226	0	777	0	485	0	1262
block4.3	DL226	0	695	0	630	0	1325
block4.3	ED3046	0	545	0	319	0	864
block4.3	ED3046	0	663	0	421	0	1084
block4.3	ED3046	0	676	1	289	1	965
block4.3	ED3049	0	602	0	328	0	930
block4.3	ED3049	0	616	0	269	0	885
block4.3	ED3049	0	614	1	267	1	881
block4.3	JU1172	0	556	0	702	0	1258
block4.3	JU1172	0	502	1	680	1	1182
block4.3	JU1172	0	437	1	370	1	807
block4.3	JU1200	0	662	0	749	0	1411
block4.3	JU1200	0	515	1	553	1	1068
block4.3	JU1200	1	658	0	527	1	1185
block4.3	JU847	0	621	0	286	0	907
block4.3	JU847	0	690	0	266	0	956
block4.3	JU847	0	689	0	193	0	882
block4.3	NIC242	0	743	1	532	1	1275
block4.3	NIC242	1	665	0	523	1	1188
block4.3	NIC242	1	753	1	571	2	1324
block4.3	NIC260	8	645	5	410	13	1055
block4.3	NIC260	4	534	2	288	6	822
block4.3	NIC260	1	775	3	374	4	1149
block4.3	NIC266	0	586	0	301	0	887
block4.3	NIC266	1	703	0	501	1	1204
block4.3	NIC266	0	622	2	542	2	1164
block4.3	NIC272	0	618	1	369	1	987
block4.3	NIC272	0	738	0	345	0	1083
block4.3	NIC272	0	445	0	260	0	705
block4.3	NIC276	0	434	0	204	0	638
block4.3	NIC276	0	511	0	294	0	805
block4.3	NIC276	1	508	0	187	1	695
block4.3	PX179	0	633	1	613	1	1246
block4.3	PX179	0	634	1	615	1	1249
block4.3	PX179	0	678	1	602	1	1280
block4.3	QG557	0	473	1	331	1	804
block4.3	QG557	0	605	3	386	3	991
block4.3	QG557	0	650	3	410	3	1060
block4.4	CB4856	0	423	0	164	0	587
block4.4	CB4856	7	581	5	211	12	792
block4.4	CB4856	0	552	0	306	0	858
block4.4	AB1	0	440	0	204	0	644
block4.4	AB1	0	581	0	345	0	926
block4.4	AB1	0	714	1	344	1	1058
block4.4	CX11271	0	593	0	521	0	1114
block4.4	CX11271	1	560	0	275	1	835
block4.4	CX11271	0	588	1	407	1	995
block4.4	DL200	0	602	0	425	0	1027
block4.4	DL200	0	613	1	500	1	1113
block4.4	DL200	0	696	0	522	0	1218
block4.4	DL226	0	507	0	351	0	858
block4.4	DL226	0	635	0	511	0	1146
block4.4	DL226	0	521	0	222	0	743
block4.4	ED3046	1	618	0	250	1	868
block4.4	ED3046	0	675	1	213	1	888
block4.4	ED3046	0	640	0	267	0	907
block4.4	ED3049	0	551	0	252	0	803
block4.4	ED3049	0	599	0	133	0	732
block4.4	ED3049	0	617	0	222	0	839
block4.4	JU1172	0	456	0	418	0	874
block4.4	JU1172	1	457	1	431	2	888
block4.4	JU1172	0	394	0	567	0	961
block4.4	JU1200	0	616	0	406	0	1022
block4.4	JU1200	0	622	2	468	2	1090
block4.4	JU1200	0	706	0	400	0	1106
block4.4	JU847	0	612	0	187	0	799
block4.4	JU847	0	701	0	197	0	898
block4.4	JU847	0	616	0	318	0	934
block4.4	NIC242	0	635	0	381	0	1016
block4.4	NIC242	0	679	0	356	0	1035
block4.4	NIC242	0	646	0	269	0	915
block4.4	NIC260	4	649	2	307	6	956
block4.4	NIC260	0	358	1	141	1	499
block4.4	NIC260	0	600	4	260	4	860
block4.4	NIC266	0	699	0	449	0	1148
block4.4	NIC266	0	636	1	414	1	1050
block4.4	NIC266	0	575	0	495	0	1070
block4.4	NIC272	0	574	0	273	0	847
block4.4	NIC272	0	648	0	336	0	984
block4.4	NIC272	0	534	3	317	3	851
block4.4	NIC276	0	643	0	226	0	869
block4.4	NIC276	0	618	0	221	0	839
block4.4	NIC276	0	475	0	193	0	668
block4.4	PX179	0	673	0	405	0	1078
block4.4	PX179	1	660	0	522	1	1182
block4.4	PX179	0	703	0	301	0	1004
block4.4	QG557	0	599	0	252	0	851
block4.4	QG557	0	580	0	397	0	977
block4.4	QG557	0	598	0	295	0	893
block4.5	CB4856	0	541	1	364	1	905
block4.5	CB4856	0	665	0	180	0	845
block4.5	CB4856	0	706	0	250	0	956
block4.5	AB1	0	734	1	385	1	1119
block4.5	AB1	1	730	0	341	1	1071
block4.5	AB1	1	596	0	511	1	1107
block4.5	CX11271	0	702	1	467	1	1169
block4.5	CX11271	0	573	0	579	0	1152
block4.5	CX11271	0	763	0	487	0	1250
block4.5	DL200	2	791	2	488	4	1279
block4.5	DL200	0	669	0	569	0	1238
block4.5	DL200	0	730	0	519	0	1249
block4.5	DL226	0	642	1	498	1	1140
block4.5	DL226	0	761	0	523	0	1284
block4.5	DL226	0	558	0	452	0	1010
block4.5	ED3046	0	739	2	232	2	971
block4.5	ED3046	0	692	0	247	0	939
block4.5	ED3046	0	806	0	216	0	1022
block4.5	ED3049	0	716	0	310	0	1026
block4.5	ED3049	0	588	0	298	0	886
block4.5	ED3049	0	639	1	198	1	837
block4.5	JU1172	0	648	1	692	1	1340
block4.5	JU1172	0	317	0	397	0	714
block4.5	JU1172	1	569	0	694	1	1263
block4.5	JU1200	0	653	0	237	0	890
block4.5	JU1200	0	817	0	409	0	1226
block4.5	JU1200	0	819	2	395	2	1214
block4.5	JU847	0	655	0	119	0	774
block4.5	JU847	1	812	1	177	2	989
block4.5	JU847	0	825	0	185	0	1010
block4.5	NIC242	0	825	1	242	1	1067
block4.5	NIC242	0	820	2	278	2	1098
block4.5	NIC242	1	660	0	339	1	999
block4.5	NIC260	3	900	1	288	4	1188
block4.5	NIC260	3	802	0	366	3	1168
block4.5	NIC260	5	816	4	209	9	1025
block4.5	NIC266	0	643	2	546	2	1189
block4.5	NIC266	1	595	3	438	4	1033
block4.5	NIC266	0	704	0	420	0	1124
block4.5	NIC272	0	581	0	265	0	846
block4.5	NIC272	0	712	0	182	0	894
block4.5	NIC272	1	616	0	314	1	930
block4.5	NIC276	2	577	1	341	3	918
block4.5	NIC276	0	613	0	346	0	959
block4.5	NIC276	0	647	0	258	0	905
block4.5	PX179	0	842	2	483	2	1325
block4.5	PX179	0	744	0	489	0	1233
block4.5	PX179	1	702	0	430	1	1132
block4.5	QG557	0	629	0	390	0	1019
block4.5	QG557	0	681	0	439	0	1120
block4.5	QG557	0	657	1	428	1	1085
block5.1	CB4856	0	685	0	194	0	879
block5.1	CB4856	0	585	0	299	0	884
block5.1	CB4856	0	659	0	299	0	958
block5.1	ECA248	1	807	0	243	1	1050
block5.1	ECA248	0	696	1	312	1	1008
block5.1	ECA248	0	739	0	257	0	996
block5.1	ED3005	1	570	0	263	1	833
block5.1	ED3005	0	452	1	493	1	945
block5.1	ED3005	0	599	0	517	0	1116
block5.1	ED3048	0	844	0	341	0	1185
block5.1	ED3048	1	744	0	349	1	1093
block5.1	ED3048	2	708	0	543	2	1251
block5.1	ED3073	0	812	0	295	0	1107
block5.1	ED3073	2	818	1	353	3	1171
block5.1	ED3073	0	674	2	361	2	1035
block5.1	JU1530	1	704	2	514	3	1218
block5.1	JU1530	0	582	1	440	1	1022
block5.1	JU1530	0	677	0	503	0	1180
block5.1	JU1580	0	598	1	398	1	996
block5.1	JU1580	0	467	0	352	0	819
block5.1	JU1580	0	518	1	404	1	922
block5.1	JU2464	3	652	0	269	3	921
block5.1	JU2464	1	368	0	250	1	618
block5.1	JU2464	1	601	0	235	1	836
block5.1	JU367	1	698	0	135	1	833
block5.1	JU367	3	645	0	152	3	797
block5.1	JU367	0	614	0	252	0	866
block5.1	JU393	1	753	2	237	3	990
block5.1	JU393	0	762	0	295	0	1057
block5.1	JU393	0	786	0	329	0	1115
block5.1	JU778	2	752	0	317	2	1069
block5.1	JU778	2	756	0	358	2	1114
block5.1	JU778	0	753	0	314	0	1067
block5.1	KR314	1	826	0	263	1	1089
block5.1	KR314	1	869	0	201	1	1070
block5.1	KR314	0	1005	0	207	0	1212
block5.1	MY18	0	649	0	433	0	1082
block5.1	MY18	0	678	0	396	0	1074
block5.1	MY18	0	620	0	421	0	1041
block5.1	NIC207	0	732	0	281	0	1013
block5.1	NIC207	0	736	0	333	0	1069
block5.1	NIC207	0	688	0	394	0	1082
block5.1	NIC251	0	606	0	195	0	801
block5.1	NIC251	2	707	0	182	2	889
block5.1	NIC251	0	831	0	161	0	992
block5.1	NIC265	0	704	2	149	2	853
block5.1	NIC265	0	739	0	198	0	937
block5.1	NIC265	1	795	1	218	2	1013
block5.1	NIC271	0	681	1	203	1	884
block5.1	NIC271	2	494	0	134	2	628
block5.1	NIC271	1	415	0	82	1	497
block5.1	NIC275	0	660	0	410	0	1070
block5.1	NIC275	0	757	0	339	0	1096
block5.1	NIC275	0	821	1	452	1	1273
block5.2	CB4856	0	519	0	267	0	786
block5.2	CB4856	0	452	0	322	0	774
block5.2	CB4856	0	491	0	436	0	927
block5.2	ECA248	0	588	0	317	0	905
block5.2	ECA248	0	579	0	294	0	873
block5.2	ECA248	0	633	0	460	0	1093
block5.2	ED3005	0	440	0	263	0	703
block5.2	ED3005	0	446	1	423	1	869
block5.2	ED3005	0	491	0	451	0	942
block5.2	ED3048	0	439	0	376	0	815
block5.2	ED3048	1	526	1	551	2	1077
block5.2	ED3048	2	603	0	595	2	1198
block5.2	ED3073	0	478	0	224	0	702
block5.2	ED3073	1	513	1	343	2	856
block5.2	ED3073	1	628	3	469	4	1097
block5.2	JU1530	0	481	0	585	0	1066
block5.2	JU1530	0	497	1	585	1	1082
block5.2	JU1530	1	634	0	575	1	1209
block5.2	JU1580	0	432	0	468	0	900
block5.2	JU1580	0	494	0	585	0	1079
block5.2	JU1580	0	502	0	516	0	1018
block5.2	JU2464	0	477	1	267	1	744
block5.2	JU2464	1	487	1	510	2	997
block5.2	JU2464	0	418	1	461	1	879
block5.2	JU367	0	505	0	256	0	761
block5.2	JU367	0	580	0	255	0	835
block5.2	JU367	1	564	0	201	1	765
block5.2	JU393	0	458	0	264	0	722
block5.2	JU393	0	569	0	329	0	898
block5.2	JU393	0	536	0	432	0	968
block5.2	JU778	0	587	0	455	0	1042
block5.2	JU778	0	571	1	485	1	1056
block5.2	JU778	0	584	1	437	1	1021
block5.2	KR314	0	697	0	331	0	1028
block5.2	KR314	0	719	0	296	0	1015
block5.2	KR314	0	713	0	397	0	1110
block5.2	MY18	0	602	0	397	0	999
block5.2	MY18	0	584	0	559	0	1143
block5.2	MY18	0	567	0	559	0	1126
block5.2	NIC207	1	524	1	375	2	899
block5.2	NIC207	1	525	0	435	1	960
block5.2	NIC207	2	580	0	456	2	1036
block5.2	NIC251	0	665	0	252	0	917
block5.2	NIC251	0	673	0	159	0	832
block5.2	NIC251	0	607	0	287	0	894
block5.2	NIC265	2	608	1	265	3	873
block5.2	NIC265	1	643	1	251	2	894
block5.2	NIC265	0	622	0	368	0	990
block5.2	NIC271	0	474	0	301	0	775
block5.2	NIC271	0	383	0	301	0	684
block5.2	NIC271	0	474	0	302	0	776
block5.2	NIC275	0	542	2	583	2	1125
block5.2	NIC275	0	462	0	419	0	881
block5.2	NIC275	1	590	0	654	1	1244
block5.3	CB4856	0	511	0	507	0	1018
block5.3	CB4856	1	635	1	329	2	964
block5.3	CB4856	0	646	0	400	0	1046
block5.3	ECA248	1	727	1	444	2	1171
block5.3	ECA248	0	700	0	319	0	1019
block5.3	ECA248	0	738	0	577	0	1315
block5.3	ED3005	1	506	1	541	2	1047
block5.3	ED3005	1	515	0	522	1	1037
block5.3	ED3005	0	551	0	356	0	907
block5.3	ED3048	0	647	1	707	1	1354
block5.3	ED3048	0	695	0	554	0	1249
block5.3	ED3048	0	662	1	936	1	1598
block5.3	ED3073	0	783	3	398	3	1181
block5.3	ED3073	0	749	0	424	0	1173
block5.3	ED3073	0	801	2	450	2	1251
block5.3	JU1530	0	719	2	711	2	1430
block5.3	JU1530	0	629	1	744	1	1373
block5.3	JU1530	0	717	1	672	1	1389
block5.3	JU1580	2	579	3	639	5	1218
block5.3	JU1580	0	525	0	849	0	1374
block5.3	JU1580	0	441	1	697	1	1138
block5.3	JU2464	1	592	1	358	2	950
block5.3	JU2464	0	627	0	447	0	1074
block5.3	JU2464	0	542	0	345	0	887
block5.3	JU367	1	674	1	478	2	1152
block5.3	JU367	0	679	1	192	1	871
block5.3	JU367	0	654	1	522	1	1176
block5.3	JU393	0	720	0	466	0	1186
block5.3	JU393	1	737	0	432	1	1169
block5.3	JU393	0	774	0	491	0	1265
block5.3	JU778	0	689	0	600	0	1289
block5.3	JU778	0	689	2	527	2	1216
block5.3	JU778	0	673	0	649	0	1322
block5.3	KR314	0	841	0	345	0	1186
block5.3	KR314	1	903	0	224	1	1127
block5.3	KR314	0	944	1	333	1	1277
block5.3	MY18	0	681	0	415	0	1096
block5.3	MY18	0	706	0	677	0	1383
block5.3	MY18	0	780	0	509	0	1289
block5.3	NIC207	0	626	0	709	0	1335
block5.3	NIC207	0	708	1	558	1	1266
block5.3	NIC207	0	615	2	539	2	1154
block5.3	NIC251	0	748	0	226	0	974
block5.3	NIC251	2	828	2	366	4	1194
block5.3	NIC251	0	521	2	267	2	788
block5.3	NIC265	0	806	1	327	1	1133
block5.3	NIC265	0	757	2	338	2	1095
block5.3	NIC265	0	695	1	344	1	1039
block5.3	NIC271	0	454	0	119	0	573
block5.3	NIC271	1	322	1	200	2	522
block5.3	NIC271	0	478	3	363	3	841
block5.3	NIC275	0	649	0	592	0	1241
block5.3	NIC275	0	658	0	706	0	1364
block5.3	NIC275	0	628	1	439	1	1067
block5.4	CB4856	0	513	0	296	0	809
block5.4	CB4856	0	653	0	322	0	975
block5.4	CB4856	0	642	0	318	0	960
block5.4	ECA248	1	734	1	296	2	1030
block5.4	ECA248	1	817	1	323	2	1140
block5.4	ECA248	0	821	0	435	0	1256
block5.4	ED3005	0	577	1	348	1	925
block5.4	ED3005	0	708	1	332	1	1040
block5.4	ED3005	1	658	3	427	4	1085
block5.4	ED3048	0	773	0	629	0	1402
block5.4	ED3048	0	827	0	542	0	1369
block5.4	ED3048	0	854	0	474	0	1328
block5.4	ED3073	0	802	0	406	0	1208
block5.4	ED3073	0	846	1	259	1	1105
block5.4	ED3073	0	799	0	331	0	1130
block5.4	JU1530	1	757	1	536	2	1293
block5.4	JU1530	2	718	0	717	2	1435
block5.4	JU1530	0	758	1	589	1	1347
block5.4	JU1580	0	659	1	640	1	1299
block5.4	JU1580	2	552	0	592	2	1144
block5.4	JU1580	0	672	0	454	0	1126
block5.4	JU2464	1	622	2	157	3	779
block5.4	JU2464	0	549	0	192	0	741
block5.4	JU2464	1	671	0	190	1	861
block5.4	JU367	1	711	2	212	3	923
block5.4	JU367	1	772	2	285	3	1057
block5.4	JU367	1	730	2	280	3	1010
block5.4	JU393	0	863	0	247	0	1110
block5.4	JU393	0	845	0	280	0	1125
block5.4	JU393	1	839	0	280	1	1119
block5.4	JU778	2	755	2	328	4	1083
block5.4	JU778	0	642	1	439	1	1081
block5.4	JU778	0	808	0	331	0	1139
block5.4	KR314	0	936	0	113	0	1049
block5.4	KR314	0	865	0	147	0	1012
block5.4	KR314	0	940	0	90	0	1030
block5.4	MY18	0	802	1	362	1	1164
block5.4	MY18	1	823	0	335	1	1158
block5.4	MY18	1	718	0	390	1	1108
block5.4	NIC207	0	701	2	492	2	1193
block5.4	NIC207	0	632	0	440	0	1072
block5.4	NIC207	1	603	0	439	1	1042
block5.4	NIC251	1	889	0	212	1	1101
block5.4	NIC251	1	860	0	98	1	958
block5.4	NIC251	0	654	1	121	1	775
block5.4	NIC265	2	745	0	178	2	923
block5.4	NIC265	0	760	1	152	1	912
block5.4	NIC265	0	749	2	268	2	1017
block5.4	NIC271	2	249	0	19	2	268
block5.4	NIC271	0	585	0	152	0	737
block5.4	NIC271	3	352	0	63	3	415
block5.4	NIC275	0	844	0	450	0	1294
block5.4	NIC275	0	725	0	503	0	1228
block5.4	NIC275	2	872	0	392	2	1264
block5.5	CB4856	0	561	1	352	1	913
block5.5	CB4856	0	618	0	298	0	916
block5.5	CB4856	0	603	0	371	0	974
block5.5	ECA248	0	754	0	350	0	1104
block5.5	ECA248	0	687	1	291	1	978
block5.5	ECA248	0	551	0	372	0	923
block5.5	ED3005	1	471	0	359	1	830
block5.5	ED3005	0	506	0	373	0	879
block5.5	ED3005	0	569	0	454	0	1023
block5.5	ED3048	0	823	1	553	1	1376
block5.5	ED3048	1	777	1	539	2	1316
block5.5	ED3048	0	785	0	815	0	1600
block5.5	ED3073	0	858	2	395	2	1253
block5.5	ED3073	0	794	0	346	0	1140
block5.5	ED3073	0	727	2	597	2	1324
block5.5	JU1530	0	771	0	429	0	1200
block5.5	JU1530	0	733	0	692	0	1425
block5.5	JU1530	0	783	0	637	0	1420
block5.5	JU1580	0	606	0	525	0	1131
block5.5	JU1580	1	561	1	592	2	1153
block5.5	JU1580	0	581	3	602	3	1183
block5.5	JU2464	0	470	0	358	0	828
block5.5	JU2464	0	614	0	258	0	872
block5.5	JU2464	0	596	1	429	1	1025
block5.5	JU367	0	727	0	163	0	890
block5.5	JU367	0	667	1	247	1	914
block5.5	JU367	0	661	0	304	0	965
block5.5	JU393	0	641	1	386	1	1027
block5.5	JU393	0	708	4	452	4	1160
block5.5	JU393	0	664	0	532	0	1196
block5.5	JU778	1	750	0	453	1	1203
block5.5	JU778	0	824	0	403	0	1227
block5.5	JU778	0	794	1	313	1	1107
block5.5	KR314	0	835	0	234	0	1069
block5.5	KR314	2	947	0	196	2	1143
block5.5	KR314	0	942	0	137	0	1079
block5.5	MY18	1	737	2	481	3	1218
block5.5	MY18	0	625	0	517	0	1142
block5.5	MY18	0	722	1	479	1	1201
block5.5	NIC207	0	510	0	508	0	1018
block5.5	NIC207	0	768	0	626	0	1394
block5.5	NIC207	0	815	0	570	0	1385
block5.5	NIC251	0	821	0	266	0	1087
block5.5	NIC251	0	766	0	293	0	1059
block5.5	NIC251	1	815	2	380	3	1195
block5.5	NIC265	1	653	2	278	3	931
block5.5	NIC265	1	776	2	267	3	1043
block5.5	NIC265	0	745	1	337	1	1082
block5.5	NIC271	0	622	1	311	1	933
block5.5	NIC271	0	553	0	254	0	807
block5.5	NIC271	3	525	1	301	4	826
block5.5	NIC275	1	761	0	351	1	1112
block5.5	NIC275	0	743	0	675	0	1418
block5.5	NIC275	0	588	0	426	0	1014
block6.1	CB4856	0	646	0	432	0	1078
block6.1	CB4856	0	636	1	319	1	955
block6.1	CB4856	0	481	0	319	0	800
block6.1	CB4854	0	657	0	417	0	1074
block6.1	CB4854	0	610	0	478	0	1088
block6.1	CB4854	1	670	0	474	1	1144
block6.1	CB4932	0	604	0	546	0	1150
block6.1	CB4932	0	611	0	684	0	1295
block6.1	CB4932	0	733	1	419	1	1152
block6.1	ED3077	0	713	0	542	0	1255
block6.1	ED3077	0	630	0	550	0	1180
block6.1	ED3077	0	762	1	658	1	1420
block6.1	EG4349	0	760	0	759	0	1519
block6.1	EG4349	0	652	0	659	0	1311
block6.1	EG4349	0	745	12	676	12	1421
block6.1	JU1212	0	732	0	797	0	1529
block6.1	JU1212	0	750	0	709	0	1459
block6.1	JU1212	0	895	0	617	0	1512
block6.1	JU1246	0	661	1	394	1	1055
block6.1	JU1246	0	666	0	444	0	1110
block6.1	JU1246	0	730	0	588	0	1318
block6.1	JU2513	0	551	1	348	1	899
block6.1	JU2513	0	836	0	480	0	1316
block6.1	JU2513	0	651	1	548	1	1199
block6.1	JU2522	0	641	0	460	0	1101
block6.1	JU2522	0	707	0	425	0	1132
block6.1	JU2522	0	599	1	480	1	1079
block6.1	JU310	0	612	0	627	0	1239
block6.1	JU310	0	576	0	600	0	1176
block6.1	JU310	0	508	1	385	1	893
block6.1	JU360	1	667	0	138	1	805
block6.1	JU360	0	659	0	182	0	841
block6.1	JU360	0	700	0	161	0	861
block6.1	JU406	1	623	0	413	1	1036
block6.1	JU406	0	535	0	196	0	731
block6.1	JU406	1	649	0	133	1	782
block6.1	JU792	0	564	1	503	1	1067
block6.1	JU792	0	615	0	603	0	1218
block6.1	JU792	0	578	0	624	0	1202
block6.1	NIC166	0	663	1	349	1	1012
block6.1	NIC166	0	551	0	290	0	841
block6.1	NIC166	0	579	0	426	0	1005
block6.1	NIC195	2	705	2	364	4	1069
block6.1	NIC195	0	617	0	583	0	1200
block6.1	NIC195	0	650	0	610	0	1260
block6.1	NIC236	0	568	1	416	1	984
block6.1	NIC236	0	585	0	487	0	1072
block6.1	NIC236	0	646	0	403	0	1049
block6.1	NIC255	0	685	0	440	0	1125
block6.1	NIC255	0	549	0	450	0	999
block6.1	NIC255	0	727	0	382	0	1109
block6.1	QW947	0	631	0	505	0	1136
block6.1	QW947	0	719	0	452	0	1171
block6.1	QW947	0	780	0	457	0	1237
block6.1	QX1212	0	467	1	413	1	880
block6.1	QX1212	0	591	0	601	0	1192
block6.1	QX1212	0	648	0	602	0	1250
block6.2	CB4856	0	654	1	453	1	1107
block6.2	CB4856	0	735	0	284	0	1019
block6.2	CB4856	0	586	0	483	0	1069
block6.2	CB4854	0	627	1	628	1	1255
block6.2	CB4854	0	650	0	489	0	1139
block6.2	CB4854	0	713	0	497	0	1210
block6.2	CB4932	0	656	2	321	2	977
block6.2	CB4932	0	537	0	248	0	785
block6.2	CB4932	0	774	0	482	0	1256
block6.2	ED3077	0	598	0	689	0	1287
block6.2	ED3077	0	660	1	641	1	1301
block6.2	ED3077	0	723	0	513	0	1236
block6.2	EG4349	0	643	1	504	1	1147
block6.2	EG4349	0	629	0	735	0	1364
block6.2	EG4349	0	759	0	586	0	1345
block6.2	JU1212	0	665	0	536	0	1201
block6.2	JU1212	1	793	0	573	1	1366
block6.2	JU1212	0	673	1	667	1	1340
block6.2	JU1246	1	672	1	400	2	1072
block6.2	JU1246	1	700	2	480	3	1180
block6.2	JU1246	1	743	0	645	1	1388
block6.2	JU2513	1	812	0	454	1	1266
block6.2	JU2513	1	710	2	570	3	1280
block6.2	JU2513	0	753	0	607	0	1360
block6.2	JU2522	1	690	2	489	3	1179
block6.2	JU2522	0	634	0	640	0	1274
block6.2	JU2522	0	626	0	553	0	1179
block6.2	JU310	0	611	1	634	1	1245
block6.2	JU310	1	500	0	603	1	1103
block6.2	JU310	1	615	1	621	2	1236
block6.2	JU360	1	645	0	183	1	828
block6.2	JU360	0	717	1	234	1	951
block6.2	JU360	0	732	0	381	0	1113
block6.2	JU406	0	681	1	429	1	1110
block6.2	JU406	1	669	2	403	3	1072
block6.2	JU406	0	434	0	131	0	565
block6.2	JU792	1	571	0	572	1	1143
block6.2	JU792	0	618	0	415	0	1033
block6.2	JU792	1	572	0	567	1	1139
block6.2	NIC166	1	592	0	270	1	862
block6.2	NIC166	0	582	0	432	0	1014
block6.2	NIC166	1	617	0	396	1	1013
block6.2	NIC195	0	710	0	504	0	1214
block6.2	NIC195	0	714	0	580	0	1294
block6.2	NIC195	0	678	0	516	0	1194
block6.2	NIC236	0	576	0	363	0	939
block6.2	NIC236	0	622	2	347	2	969
block6.2	NIC236	0	604	0	486	0	1090
block6.2	NIC255	0	714	0	587	0	1301
block6.2	NIC255	0	645	0	587	0	1232
block6.2	NIC255	0	721	0	568	0	1289
block6.2	QW947	1	719	0	459	1	1178
block6.2	QW947	2	713	0	396	2	1109
block6.2	QW947	0	640	0	348	0	988
block6.2	QX1212	0	699	0	575	0	1274
block6.2	QX1212	0	625	3	587	3	1212
block6.2	QX1212	1	713	0	411	1	1124
block6.3	CB4856	1	592	0	299	1	891
block6.3	CB4856	0	504	0	379	0	883
block6.3	CB4856	0	602	1	422	1	1024
block6.3	CB4854	0	719	0	304	0	1023
block6.3	CB4854	0	691	0	312	0	1003
block6.3	CB4854	0	611	1	442	1	1053
block6.3	CB4932	0	638	1	391	1	1029
block6.3	CB4932	0	639	1	550	1	1189
block6.3	CB4932	0	504	1	399	1	903
block6.3	ED3077	0	679	0	474	0	1153
block6.3	ED3077	0	627	1	564	1	1191
block6.3	ED3077	0	709	0	557	0	1266
block6.3	EG4349	0	601	0	489	0	1090
block6.3	EG4349	0	511	0	525	0	1036
block6.3	EG4349	1	692	1	457	2	1149
block6.3	JU1212	1	661	0	763	1	1424
block6.3	JU1212	0	418	1	489	1	907
block6.3	JU1212	0	732	0	718	0	1450
block6.3	JU1246	1	678	0	491	1	1169
block6.3	JU1246	1	709	0	576	1	1285
block6.3	JU1246	1	522	0	754	1	1276
block6.3	JU2513	3	482	0	489	3	971
block6.3	JU2513	2	566	1	476	3	1042
block6.3	JU2513	0	756	1	505	1	1261
block6.3	JU2522	0	531	1	430	1	961
block6.3	JU2522	0	559	0	639	0	1198
block6.3	JU2522	0	469	0	441	0	910
block6.3	JU310	0	549	0	524	0	1073
block6.3	JU310	0	593	0	442	0	1035
block6.3	JU310	0	590	1	418	1	1008
block6.3	JU360	3	667	0	169	3	836
block6.3	JU360	0	607	1	247	1	854
block6.3	JU360	0	579	0	404	0	983
block6.3	JU406	1	413	0	77	1	490
block6.3	JU406	1	581	2	649	3	1230
block6.3	JU406	1	697	1	400	2	1097
block6.3	JU792	1	608	0	429	1	1037
block6.3	JU792	1	558	2	531	3	1089
block6.3	JU792	0	619	0	477	0	1096
block6.3	NIC166	0	459	0	380	0	839
block6.3	NIC166	0	635	0	398	0	1033
block6.3	NIC166	0	567	0	484	0	1051
block6.3	NIC195	1	633	0	478	1	1111
block6.3	NIC195	0	626	0	395	0	1021
block6.3	NIC195	0	690	0	389	0	1079
block6.3	NIC236	0	529	0	301	0	830
block6.3	NIC236	0	605	0	346	0	951
block6.3	NIC236	0	530	1	573	1	1103
block6.3	NIC255	0	631	0	578	0	1209
block6.3	NIC255	0	628	0	391	0	1019
block6.3	NIC255	0	571	0	462	0	1033
block6.3	QW947	0	707	0	376	0	1083
block6.3	QW947	0	625	1	465	1	1090
block6.3	QW947	0	629	0	399	0	1028
block6.3	QX1212	1	616	0	463	1	1079
block6.3	QX1212	0	631	0	397	0	1028
block6.3	QX1212	0	615	0	493	0	1108
block6.4	CB4856	0	412	0	512	0	924
block6.4	CB4856	0	461	0	541	0	1002
block6.4	CB4856	0	379	0	635	0	1014
block6.4	CB4854	0	332	0	687	0	1019
block6.4	CB4854	0	340	0	738	0	1078
block6.4	CB4854	0	321	0	574	0	895
block6.4	CB4932	0	393	0	811	0	1204
block6.4	CB4932	0	341	1	733	1	1074
block6.4	CB4932	0	404	0	645	0	1049
block6.4	ED3077	1	451	1	758	2	1209
block6.4	ED3077	0	435	0	798	0	1233
block6.4	ED3077	0	521	0	813	0	1334
block6.4	EG4349	0	378	0	713	0	1091
block6.4	EG4349	0	408	1	718	1	1126
block6.4	EG4349	0	553	0	656	0	1209
block6.4	JU1212	0	644	0	676	0	1320
block6.4	JU1212	1	556	0	530	1	1086
block6.4	JU1212	0	426	0	734	0	1160
block6.4	JU1246	0	360	1	664	1	1024
block6.4	JU1246	0	322	2	734	2	1056
block6.4	JU1246	0	394	1	887	1	1281
block6.4	JU2513	0	446	0	605	0	1051
block6.4	JU2513	0	452	1	769	1	1221
block6.4	JU2513	0	574	0	563	0	1137
block6.4	JU2522	0	302	1	559	1	861
block6.4	JU2522	0	171	0	304	0	475
block6.4	JU2522	0	370	0	794	0	1164
block6.4	JU310	0	240	0	725	0	965
block6.4	JU310	0	309	1	842	1	1151
block6.4	JU310	0	315	1	775	1	1090
block6.4	JU360	1	385	0	448	1	833
block6.4	JU360	0	383	0	409	0	792
block6.4	JU360	0	351	0	428	0	779
block6.4	JU406	0	188	0	263	0	451
block6.4	JU406	0	294	0	547	0	841
block6.4	JU406	0	221	2	546	2	767
block6.4	JU792	0	264	0	555	0	819
block6.4	JU792	0	205	0	686	0	891
block6.4	JU792	0	334	1	644	1	978
block6.4	NIC166	0	280	0	520	0	800
block6.4	NIC166	0	291	0	651	0	942
block6.4	NIC166	0	318	0	621	0	939
block6.4	NIC195	1	502	1	583	2	1085
block6.4	NIC195	0	392	0	691	0	1083
block6.4	NIC195	1	380	0	599	1	979
block6.4	NIC236	1	299	0	410	1	709
block6.4	NIC236	0	353	0	418	0	771
block6.4	NIC236	0	370	1	742	1	1112
block6.4	NIC255	0	461	1	702	1	1163
block6.4	NIC255	0	436	2	778	2	1214
block6.4	NIC255	0	416	0	676	0	1092
block6.4	QW947	0	559	0	529	0	1088
block6.4	QW947	0	449	2	591	2	1040
block6.4	QW947	0	470	0	579	0	1049
block6.4	QX1212	0	305	2	659	2	964
block6.4	QX1212	0	311	0	777	0	1088
block6.4	QX1212	0	364	1	851	1	1215
block6.5	CB4856	0	479	0	251	0	730
block6.5	CB4856	0	552	0	412	0	964
block6.5	CB4856	0	617	0	436	0	1053
block6.5	CB4854	0	705	1	444	1	1149
block6.5	CB4854	2	665	1	434	3	1099
block6.5	CB4854	0	681	0	573	0	1254
block6.5	CB4932	0	651	0	530	0	1181
block6.5	CB4932	0	620	0	373	0	993
block6.5	CB4932	0	748	0	443	0	1191
block6.5	ED3077	0	746	0	537	0	1283
block6.5	ED3077	0	683	1	553	1	1236
block6.5	ED3077	0	763	1	696	1	1459
block6.5	EG4349	0	575	0	472	0	1047
block6.5	EG4349	1	702	1	443	2	1145
block6.5	EG4349	0	716	1	621	1	1337
block6.5	JU1212	1	651	0	661	1	1312
block6.5	JU1212	0	561	0	854	0	1415
block6.5	JU1212	0	807	0	508	0	1315
block6.5	JU1246	0	549	0	282	0	831
block6.5	JU1246	1	568	1	548	2	1116
block6.5	JU1246	0	549	0	476	0	1025
block6.5	JU2513	0	751	1	468	1	1219
block6.5	JU2513	0	678	0	602	0	1280
block6.5	JU2513	0	708	0	546	0	1254
block6.5	JU2522	0	785	0	441	0	1226
block6.5	JU2522	0	636	1	380	1	1016
block6.5	JU2522	0	625	0	543	0	1168
block6.5	JU310	0	542	0	594	0	1136
block6.5	JU310	1	518	0	670	1	1188
block6.5	JU310	0	624	0	778	0	1402
block6.5	JU360	2	720	0	138	2	858
block6.5	JU360	0	715	0	170	0	885
block6.5	JU360	0	740	0	162	0	902
block6.5	JU406	0	663	0	419	0	1082
block6.5	JU406	0	558	0	502	0	1060
block6.5	JU406	2	640	0	473	2	1113
block6.5	JU792	1	637	0	548	1	1185
block6.5	JU792	0	638	0	476	0	1114
block6.5	JU792	0	498	0	419	0	917
block6.5	NIC166	0	679	1	387	1	1066
block6.5	NIC166	0	635	0	208	0	843
block6.5	NIC166	0	563	0	291	0	854
block6.5	NIC195	1	668	0	564	1	1232
block6.5	NIC195	0	688	0	342	0	1030
block6.5	NIC195	0	714	0	517	0	1231
block6.5	NIC236	0	661	0	457	0	1118
block6.5	NIC236	0	651	1	377	1	1028
block6.5	NIC236	0	532	0	290	0	822
block6.5	NIC255	0	718	0	479	0	1197
block6.5	NIC255	0	593	1	397	1	990
block6.5	NIC255	0	662	1	596	1	1258
block6.5	QW947	2	706	0	280	2	986
block6.5	QW947	0	636	0	268	0	904
block6.5	QW947	2	810	0	280	2	1090
block6.5	QX1212	0	632	0	594	0	1226
block6.5	QX1212	2	580	2	476	4	1056
block6.5	QX1212	0	602	0	618	0	1220

## Sheet: phenotypic change
strain	broodsize	maleproductionrate
LKC34	-0.23937	0.792342
CX11314	-0.23956	0.688069
JT11398	-0.484	0.700757
ED3017	-0.24236	1
JU258	-0.4017	0.324975
EG4725	-0.25654	1
MY23	-0.51861	0.509538
MY16	-0.42426	0.573532
DL238	-0.44228	0.075146
ED3040	-0.22221	0.76014
JU1242	-0.27769	0.041794
MY1	-0.31163	1
JU774	-0.34725	0.694635
NIC274	-0.45185	-0.05013
JU311	-0.53828	NaN
JU1581	-0.12644	0.621215
CX11285	-0.51375	0.432307
JU1088	-0.56479	1
JU1409	-0.32589	0.648675
CX11276	-0.15335	0.550746
JU2007	-0.30702	0.791178
QG2075	-0.42371	-0.06051
BRC20067	-0.22444	0.504163
PB303	-0.30602	0.573541
JU440	-0.15405	0.379231
JU323	-0.64685	0.003284
JU830	-0.0992	1
NIC3	-0.12229	0.229669
NIC261	0.197038	0.113167
NIC2	-0.08934	0.311342
JU1568	-0.03202	1
JU2519	-0.41434	0.449712
NIC1	-0.12048	0.726842
NIC252	-0.20102	0.492418
JU2466	0.14154	0.197155
QX1794	-0.693	0.076065
JU1440	-0.03044	0.357276
JU346	0.067918	-0.04219
JU1213	-0.00346	0.453607
ED3052	-0.02364	0.008928
NIC256	-0.13494	0.489983
NIC277	-0.25307	0.357293
NIC199	-0.11335	0.431539
JU1200	-0.17838	0.560664
JU847	-0.44687	0.289153
NIC266	-0.13356	0.584013
ED3049	-0.37896	1
JU1172	-0.00067	0.313396
CX11271	-0.12053	0.397288
NIC276	-0.33517	-0.03155
DL200	-0.08646	0.68747
DL226	-0.18635	0.110838
AB1	-0.2878	0.765453
ED3046	-0.41507	0.819642
PX179	-0.17128	0.679391
NIC242	-0.26814	0.673096
NIC272	-0.29075	0.152632
QG557	-0.27165	0.793664
MY18	-0.19531	0.377554
NIC251	-0.52061	0.487792
ED3005	-0.13659	0.386008
NIC275	-0.16443	0.152259
ED3048	-0.11467	-0.16355
NIC265	-0.46549	0.704286
NIC271	-0.38914	0.098638
ED3073	-0.32457	0.750518
JU1580	0.007636	0.377699
JU393	-0.32303	0.648055
NIC207	-0.15416	0.13627
JU778	-0.24759	0.331126
JU367	-0.43047	0.441976
KR314	-0.57396	-0.24981
JU1530	-0.06449	0.387179
ECA248	-0.33296	0.470456
JU2464	-0.27359	0.186156
JU1212	-0.00667	-0.33133
ED3077	-0.01875	0.644069
QW947	-0.21073	-0.25008
JU406	-0.16869	0.232643
NIC195	-0.09671	-0.32634
JU360	-0.41254	-0.28079
JU2522	-0.04817	0.768654
JU2513	-0.09552	0.172739
NIC166	-0.13518	0.298631
JU310	0.090673	0.302578
QX1212	0.006976	0.404311
JU792	0.010673	-0.06012
NIC255	-0.06291	1
EG4349	-0.01696	0.78438
CB4932	-0.07779	1
JU1246	-0.02677	0.181716
NIC236	-0.11789	0.660412
CB4854	-0.09106	0.327369
CB4856	-0.24681	0.373583

## Sheet: block_effect_corrected
strain	early_broodsize_resid_CB4856	late_broodsize_resid_CB4856	total_broodsize_resid_CB4856	early_male_resid_CB4856	late_male_resid_CB4856	total_male_resid_CB4856
AB1	42.5984	-68.1325	-25.0783	-0.000209265	0.00113205	-0.000349669
BRC20067	-28.8103	21.2599	5.15101	-0.000290435	-0.000550646	-0.000942829
CB4854	-0.876574	57.3684	44.8911	-0.000212851	-0.000697276	-0.000897898
CB4856	-46.3425	-46.135	-92.2747	-0.000111533	-0.000487543	-0.000768555
CB4932	-10.1432	62.9684	41.2245	-0.000512855	-0.000133795	-0.000861509
CX11271	36.865	64.2009	101.522	-0.000262214	-0.000673286	-0.00088697
CX11276	19.0564	109.727	141.484	-0.000207997	-0.000229829	-0.000783694
CX11285	-57.7436	-153.407	-198.449	0.000282058	0.000447657	-0.000184494
CX11314	-60.3673	32.3312	-25.2191	-0.000427155	-0.000735076	-0.00104565
DL200	67.265	122.468	190.188	-0.000352461	-0.000331425	-0.000744172
DL226	34.265	4.53422	39.2551	-0.000156897	-0.000817639	-0.000883708
DL238	-41.834	-94.2021	-133.219	0.000579803	0.000126766	-0.000195363
ECA248	79.0903	-26.5886	49.1196	-0.000166061	-0.000231848	-0.000755517
ED3005	-88.3763	28.8781	-62.8804	0.000108222	2.04255e-05	-0.000432382
ED3017	-84.834	15.2645	-66.7524	-0.000514074	-0.000925579	-0.00116602
ED3040	139.256	129.793	281.751	-0.000374214	1.75501e-05	-0.000729715
ED3046	34.465	-153.932	-119.012	-0.000413149	-0.00016031	-0.00093451
ED3048	88.157	187.678	272.453	0.00019879	-0.000725639	-0.00067019
ED3049	0.398372	-147.732	-146.878	-0.000521024	-0.000423487	-0.00104209
ED3052	-63.6226	71.2184	7.82043	0.000266366	-0.000510038	-0.000515532
ED3073	113.157	-2.52194	107.253	-0.000113688	0.00153971	-7.17382e-05
ED3077	46.3234	180.835	215.558	-0.000365035	-0.000630207	-0.000948529
EG4349	21.2568	158.835	168.491	-0.000321549	0.000554257	-0.000349943
EG4725	13.2993	63.0645	79.1809	-0.000514074	-0.000734273	-0.00111358
JT11398	25.566	-94.4688	-66.0857	-0.000149456	0.000425926	-0.000718335
JU1088	105.656	-129.54	-11.1823	-0.000514712	-0.000249631	-0.00121837
JU1172	-100.602	51.8675	-48.2783	5.61677e-05	-9.74011e-06	-0.000421343
JU1200	67.865	34.6009	102.922	-0.000303562	-0.000535685	-0.000879062
JU1212	63.9234	213.435	265.758	-0.000105618	-0.00102174	-0.000981535
JU1213	-49.2893	104.618	55.5538	0.000477212	0.00146039	0.000590259
JU1242	-16.077	-7.6068	-10.9823	-0.000147325	-0.000904723	-0.00090849
JU1246	-12.1432	115.502	91.7578	0.000208758	-0.000165505	-0.000383478
JU1409	19.0564	-20.6068	11.151	-0.000174258	0.000238972	-0.000707066
JU1440	-82.0893	47.5517	-34.3129	-0.000356194	-0.000852686	-0.00107916
JU1530	51.6903	216.011	264.32	-3.91814e-05	-0.000117608	-0.000532074
JU1568	24.5107	146.152	170.887	-0.000514547	0.000199956	-0.000653163
JU1580	-79.843	174.945	91.7196	7.78646e-05	3.37708e-05	-0.000389515
JU1581	-122.61	23.7932	-86.1157	-0.000388926	-0.000725101	-0.000983867
JU2007	70.6564	19.3265	102.684	-0.000361103	0.000174374	-0.000853532
JU2464	-73.243	-64.1886	-140.814	0.000542076	0.000459505	-7.00655e-05
JU2466	-129.289	167.285	38.2204	0.000157796	-0.000258877	-0.000459988
JU2513	48.0568	93.3018	129.758	0.000313652	-0.000209667	-0.000413873
JU2519	28.644	-153.848	-124.98	0.000440487	0.0013008	0.000193514
JU2522	-44.0099	63.1684	7.55781	-0.000416237	-0.000396731	-0.000868771
JU258	-83.5673	-87.6021	-168.352	-0.000271152	-0.000810682	-0.000979033
JU310	-86.8766	173.835	75.3578	-0.000142421	-0.000547669	-0.000774754
JU311	107.79	-114.273	6.21768	-0.000514712	-0.00125973	-0.00130834
JU323	174.523	-157.073	30.151	0.00143252	0.00109819	0.000771941
JU346	-11.6226	224.418	213.02	-0.000275521	-0.00102942	-0.00109286
JU360	17.4568	-185.098	-179.242	0.00034865	-0.000703217	-0.000526446
JU367	33.0903	-116.989	-87.2804	0.00038135	0.00120088	3.03634e-05
JU393	84.6903	-15.7886	65.5196	-0.000254348	6.88779e-05	-0.00070016
JU406	-77.2766	-69.9649	-158.842	0.000376674	-0.000155459	-0.000202548
JU440	41.523	125.593	179.818	-0.00022252	-0.000619168	-0.000928284
JU774	84.8564	-2.54014	95.0177	-3.54927e-05	0.00129514	-0.000325524
JU778	82.8237	48.0114	127.453	0.000106362	5.79815e-05	-0.000407552
JU792	-75.0766	94.5684	7.89115	5.42299e-05	-0.000770866	-0.000760905
JU830	-141.823	-58.3816	-199.98	-0.000514547	-0.00108781	-0.00122982
JU847	63.265	-160.999	-97.2783	1.05165e-05	-0.000393139	-0.000686498
KR314	239.824	-144.989	91.4529	-0.000140749	-0.00105619	-0.000962049
LKC34	33.0327	89.7979	125.648	-6.79762e-05	0.00261544	0.000197901
MY1	96.7897	29.6599	139.151	-0.000514712	-0.000418365	-0.000982784
MY16	36.4993	-51.8688	-12.5524	0.000506972	0.00258344	0.000372439
MY18	60.6237	82.7447	139.986	-0.000248487	-0.000655851	-0.000918859
MY23	-183.434	-181.469	-362.086	0.000884016	0.00217678	0.000620962
NIC1	77.5774	99.685	177.487	-0.000303941	5.90355e-05	-0.000590872
NIC166	-66.2766	-35.1649	-113.042	-0.000292193	-0.000894735	-0.00104104
NIC195	24.1234	72.3018	84.8245	0.00018963	-0.000777371	-0.000758052
NIC199	-12.4893	35.1517	22.8871	0.000361254	0.000998854	8.12315e-05
NIC2	41.5774	101.685	143.487	-5.13178e-05	-0.000510173	-0.000779096
NIC207	25.2237	97.7447	119.586	8.18551e-05	-0.000440766	-0.000623185
NIC236	-58.2766	-14.2982	-84.1755	-0.00028989	-0.000330492	-0.000827987
NIC242	59.3317	-44.2658	15.5217	-0.000231228	0.000149247	-0.000654295
NIC251	107.09	-148.255	-44.5471	7.11317e-05	0.000509124	-0.000387534
NIC252	-32.2226	-48.6483	-80.6462	-0.000152756	-8.52779e-05	-0.00063123
NIC255	10.1234	96.1684	94.6911	-0.000512855	-0.000711893	-0.00102512
NIC256	-51.8226	-13.2483	-64.8462	0.000328669	0.00152706	0.000403136
NIC261	-294.823	-11.515	-306.113	0.000656679	0.000254832	3.8737e-06
NIC265	94.157	-116.722	-25.9471	0.000261012	0.00336652	0.000414209
NIC266	-3.86829	21.0675	17.6551	2.09514e-05	0.000845386	-6.01602e-05
NIC271	-154.91	-172.255	-330.547	0.0016094	0.000392159	0.000975258
NIC272	7.46504	-89.5325	-81.6116	0.00010408	-0.000467109	-0.000611829
NIC274	-9.2103	-106.873	-103.382	-0.000298613	-0.00104674	-0.00103376
NIC275	61.0237	113.478	171.12	-0.000159295	-0.000728337	-0.000861188
NIC276	-30.0016	-136.799	-166.345	-1.86536e-05	-0.00091858	-0.000814813
NIC277	33.1774	-45.5816	-12.1796	0.000152346	0.000128596	-0.000334147
NIC3	16.644	50.2184	67.0871	-5.30003e-05	-0.000519627	-0.000721431
PB303	110.79	41.3932	164.884	-0.000116934	0.00013976	-0.000594077
PX179	86.9984	54.4675	141.922	-0.000325047	-0.000305503	-0.000767526
QG2075	-109.744	-132.607	-229.649	0.000655586	-0.00025893	-0.000263253
QG557	44.7317	-55.2658	-10.0783	-0.000298456	0.00054533	-0.000431153
QW947	52.5234	-16.4316	24.4911	0.000120336	-0.000889047	-0.00068887
QX1212	-40.4099	125.768	73.7578	-8.12433e-05	-0.000195109	-0.000505031
QX1794	37.9107	-287.182	-249.046	0.000202245	-0.000499416	-0.000524566

## Sheet: variance
strain	broodsize_early	broodsize_late	broodsize_total	maleproductionrate_early	maleproductionrate_late	maleproductionrate_total
LKC34	944.138	1223.98	1044.38	7.28e-07	3.2e-05	2.62e-06
CX11314	747.186	525.515	677.85	1.13e-07	2.28e-06	3.5e-07
JT11398	1526.56	425.186	996.604	6.45e-07	1.04e-05	6.4e-07
ED3017	1279.36	439.329	640.247	0	7.86e-07	1.45e-07
JU258	716.551	856.147	316.879	4.37e-07	1.43e-06	3.23e-07
EG4725	702.448	1128.18	947.489	0	2.4e-06	3.07e-07
MY23	421.418	309.74	816.202	8.58e-06	2.31e-05	5.17e-06
MY16	624.462	812.811	730.204	6.1e-06	8.23e-05	1.45e-05
DL238	467.263	688.758	375.538	1.93e-06	9.98e-06	9.92e-07
ED3040	661.288	753.504	356.374	2.96e-07	8.85e-06	9.82e-07
JU1242	805.517	481.997	615.338	6.25e-07	9.21e-07	6.33e-07
MY1	800.14	989.835	631.888	0	2.16e-06	3.44e-07
ECA36	412.656	39.0524	605.359	0.00131	NaN	0.001028
JU774	663.605	813.424	439.802	1.12e-06	1.37e-05	1.86e-06
NIC274	687.434	802.811	602.477	7e-07	6.8e-07	6.04e-07
JU311	655.595	247.438	728.452	0	0	0
JU1581	389.317	872.468	900.179	2.37e-07	2.05e-06	4.95e-07
CX11285	461.43	515.392	773.559	3.03e-06	1.03e-05	2.76e-06
JU1088	458.377	402.665	185.879	0	1.53e-05	1.21e-07
JU1409	389.195	887.238	355.317	5.04e-07	6.76e-06	7.99e-07
CX11276	862.579	676.67	547.525	4.09e-07	2.33e-06	6.8e-07
JU2007	1572.75	1238.61	3262.14	3.54e-07	1.34e-05	6.25e-07
QG2075	563.779	448.015	1146.26	3.09e-06	1.01e-05	1.58e-06
BRC20067	1646.26	1026.91	1285.66	3.77e-07	4.55e-06	6.96e-07
PB303	635.327	779.711	653.161	4.89e-07	3.54e-06	6.14e-07
JU440	1311.28	1136.46	927.915	6.22e-07	2.03e-06	4.65e-07
JU323	653.272	474.921	363.067	4.17e-06	2e-05	4e-06
JU830	299.829	157.64	638.54	0	4.29e-07	9.94e-08
NIC3	335.727	277.361	571.184	1.03e-06	1.18e-06	6.44e-07
NIC261	310.034	964.999	1562.27	6.56e-06	5.48e-06	3.38e-06
NIC2	686.464	909.942	1839.91	1.04e-06	1.31e-06	3.27e-07
JU1568	286.227	742.243	1153.21	0	9.66e-06	1.78e-06
JU2519	478.727	444.109	240.683	2.39e-06	9.4e-06	2.31e-06
NIC1	500.634	319.656	318.522	3.09e-07	3.17e-06	7.16e-07
NIC252	211.877	297.471	243.677	5.64e-07	3.8e-06	1.11e-06
JU2466	383.579	999.247	1476.73	1.36e-06	1.75e-06	8.95e-07
QX1794	225.702	229.91	628.439	8.6e-07	4e-06	6.36e-07
JU1440	265.399	561.052	730.513	3.76e-07	1.24e-06	4.15e-07
JU346	538.85	730.186	1802.53	3.98e-07	3.7e-07	1.41e-07
JU1213	307.481	1051.81	526.198	1.78e-06	6.6e-06	1.62e-06
ED3052	695.6	1033.56	1285.59	1.62e-06	9.14e-07	7.39e-07
NIC256	507.221	782.279	1156.39	2.33e-06	8.55e-06	3.75e-06
NIC277	99.275	1250.95	929.442	1.13e-06	4.55e-06	1.06e-06
NIC199	221.388	745.743	343.508	1.49e-06	1.01e-05	1.41e-06
JU1200	768.534	1162.85	1995	3.31e-07	2.78e-06	4.28e-07
JU847	900.026	198.347	626.114	3.05e-06	5.6e-06	3.47e-06
NIC266	1259.11	626.9	3012.14	9.82e-07	6.41e-06	2.16e-06
ED3049	636.411	167.341	983.823	0	3.2e-06	2.73e-07
JU1172	501.196	1888.38	3902.36	9.99e-07	2.48e-06	8.48e-07
CX11271	505.427	531.192	1324.74	4.7e-07	1.11e-06	2.71e-07
NIC276	1226.94	482.058	2682.21	1.18e-06	9.11e-07	8.91e-07
NIC260	1276.66	520.534	1918.81	1.11e-05	3.85e-05	9.96e-06
DL200	538.802	627.009	1473.04	4.26e-07	1.74e-06	7.69e-07
DL226	649.579	1135.23	3071.13	5.73e-07	9.64e-07	5.65e-07
AB1	794.841	657.579	2121.71	4.2e-07	1e-05	7.92e-07
ED3046	1090.63	329.016	1988.73	1.75e-07	6.4e-06	4.28e-07
PX179	611.543	831.688	1915.28	2.68e-07	1.89e-06	2.92e-07
NIC242	1479.77	733.692	2974.46	3.61e-07	4.71e-06	4.5e-07
NIC272	684.727	147.321	739.611	1.93e-06	6.22e-06	1.3e-06
QG557	285.283	324.638	724.793	3.47e-07	7.34e-06	1.24e-06
MY18	390.79	515.857	587.058	3.01e-07	1.7e-06	4.8e-07
NIC251	745.379	421.089	1221.1	9.18e-07	9.66e-06	1.41e-06
ED3005	381.37	500.436	799.704	8.42e-07	3.95e-06	9.97e-07
NIC275	844.372	891.942	1276.11	5.7e-07	1.26e-06	3.96e-07
ED3048	917.055	1643.88	2475.74	1.32e-06	6.37e-07	5.14e-07
NIC265	245.645	321.365	464.56	1.22e-06	1.28e-05	1.12e-06
NIC271	834.585	717.688	2245.51	9.58e-06	7.01e-06	6.92e-06
ED3073	846.163	513.968	1545.13	7.09e-07	7.09e-06	1.47e-06
JU1580	328.796	1051.64	1392.6	1.64e-06	2.98e-06	1.43e-06
JU393	866.381	595.401	1176.8	2.87e-07	9.28e-06	1.28e-06
NIC207	549.115	793.429	1491.88	1.19e-06	2.19e-06	7.12e-07
JU778	429.356	698.656	544.879	1.22e-06	3.61e-06	1.07e-06
JU367	306.156	743.004	1043.44	1.61e-06	1.07e-05	1.71e-06
KR314	563.651	529.022	375.102	4.57e-07	6.01e-07	3.09e-07
JU1530	562.211	617.701	1287.35	7.6e-07	1.58e-06	5.21e-07
ECA248	452.094	508.577	977.918	3.56e-07	2.31e-06	5.74e-07
JU2464	504.284	751.656	885.499	1.89e-06	1.1e-05	1.44e-06
JU1212	1103.51	769.159	1804.9	4.99e-07	3.99e-07	1.85e-07
ED3077	693.176	725.481	443.776	3.28e-07	6.46e-07	2.62e-07
QW947	647.579	667.579	447.722	1.28e-06	1e-06	7.26e-07
JU406	1858.68	1869.19	3969.68	1.14e-06	2.93e-06	1.16e-06
NIC195	770.142	658.149	602.189	1.16e-06	2.12e-06	1.09e-06
JU360	1133.37	890.254	462.022	2.02e-06	2.15e-06	1.14e-06
JU2522	1696.23	917.475	2528.8	1.4e-07	1.82e-06	5.56e-07
JU2513	1036.94	567.711	1133.3	3.18e-06	1.57e-06	1.12e-06
NIC166	1119.26	960.829	533.674	3.39e-07	9.22e-07	2.19e-07
JU310	964.865	1116.44	1023.02	5.94e-07	9.33e-07	3.06e-07
QX1212	1108.49	1075.49	807.986	9.78e-07	3.09e-06	1.33e-06
JU792	1228.84	433.605	866.097	6.91e-07	1.21e-06	5.8e-07
NIC255	689.508	922.484	693.568	0	9.52e-07	2.76e-07
EG4349	890.757	767.24	1385.36	2.55e-07	2.03e-05	4.69e-06
CB4932	1067.85	1584.47	1222	0	3.11e-06	4.03e-07
JU1246	1188.02	1589.68	1326.25	6.56e-07	1.89e-06	6.23e-07
NIC236	801.424	820.46	1093.35	7.46e-07	2.71e-06	4.53e-07
CB4854	1276.26	944.605	594.276	7.09e-07	9.51e-07	5.66e-07
CB4856	761.128	738.928	710.162	2.26e-06	7.55e-06	2.94e-06
