# Supplementary material for: Natural variation in reproductive timing and X-chromosome nondisjunction in Caenorhabditis elegans
Source: G3 (Bethesda). 2021 Sep 22;11(12):jkab327. doi: 10.1093/g3journal/jkab327 (PMC8664432; doi:10.1093/g3journal/jkab327)
Supplement: jkab327_Supplementary_Data [file jkab327_supplementary_data.zip › GENETICS-G3-2021-402755-s06.xlsx]

## Sheet: Sheet1
	group1	group2	stat	pval	pval_bonferroni_corr	reject
broodsize_early	block1.1–1.5	block2.1–2.5	2.4092	0.0228	0.3422	FALSE
broodsize_early	block1.1–1.5	block3.1–3.5	2.7946	0.0093	0.1391	FALSE
broodsize_early	block1.1–1.5	block4.1–4.5	2.4486	0.0209	0.3129	FALSE
broodsize_early	block1.1–1.5	block5.1–5.5	0.6887	0.4967	1	FALSE
broodsize_early	block1.1–1.5	block6.1–6.5	1.2885	0.2081	1	FALSE
broodsize_early	block2.1–2.5	block3.1–3.5	0.2647	0.7932	1	FALSE
broodsize_early	block2.1–2.5	block4.1–4.5	0.3123	0.7571	1	FALSE
broodsize_early	block2.1–2.5	block5.1–5.5	-2.4964	0.0187	0.2806	FALSE
broodsize_early	block2.1–2.5	block6.1–6.5	-1.3483	0.1884	1	FALSE
broodsize_early	block3.1–3.5	block4.1–4.5	0.119	0.9061	1	FALSE
broodsize_early	block3.1–3.5	block5.1–5.5	-3.2354	0.0031	0.0467	TRUE
broodsize_early	block3.1–3.5	block6.1–6.5	-1.7689	0.0878	1	FALSE
broodsize_early	block4.1–4.5	block5.1–5.5	-2.4318	0.0217	0.3251	FALSE
broodsize_early	block4.1–4.5	block6.1–6.5	-1.4809	0.1498	1	FALSE
broodsize_early	block5.1–5.5	block6.1–6.5	0.9155	0.3677	1	FALSE
broodsize_late	block1.1–1.5	block2.1–2.5	0.4892	0.6285	1	FALSE
broodsize_late	block1.1–1.5	block3.1–3.5	-2.5407	0.0169	0.2534	FALSE
broodsize_late	block1.1–1.5	block4.1–4.5	-2.0103	0.0541	0.8119	FALSE
broodsize_late	block1.1–1.5	block5.1–5.5	-1.9063	0.0669	1	FALSE
broodsize_late	block1.1–1.5	block6.1–6.5	-3.6795	0.001	0.0148	TRUE
broodsize_late	block2.1–2.5	block3.1–3.5	-3.0199	0.0053	0.0802	FALSE
broodsize_late	block2.1–2.5	block4.1–4.5	-2.4189	0.0223	0.3347	FALSE
broodsize_late	block2.1–2.5	block5.1–5.5	-2.3973	0.0234	0.3515	FALSE
broodsize_late	block2.1–2.5	block6.1–6.5	-4.0663	0.0004	0.0053	TRUE
broodsize_late	block3.1–3.5	block4.1–4.5	-0.0171	0.9865	1	FALSE
broodsize_late	block3.1–3.5	block5.1–5.5	0.7087	0.4844	1	FALSE
broodsize_late	block3.1–3.5	block6.1–6.5	-1.8292	0.078	1	FALSE
broodsize_late	block4.1–4.5	block5.1–5.5	0.5275	0.602	1	FALSE
broodsize_late	block4.1–4.5	block6.1–6.5	-1.4379	0.1615	1	FALSE
broodsize_late	block5.1–5.5	block6.1–6.5	-2.3314	0.0272	0.4073	FALSE
broodsize_total	block1.1–1.5	block2.1–2.5	4.8268	0	0.0007	TRUE
broodsize_total	block1.1–1.5	block3.1–3.5	1.3119	0.2002	1	FALSE
broodsize_total	block1.1–1.5	block4.1–4.5	1.0295	0.3121	1	FALSE
broodsize_total	block1.1–1.5	block5.1–5.5	-1.2001	0.2402	1	FALSE
broodsize_total	block1.1–1.5	block6.1–6.5	-2.4701	0.0199	0.298	FALSE
broodsize_total	block2.1–2.5	block3.1–3.5	-3.8066	0.0007	0.0106	TRUE
broodsize_total	block2.1–2.5	block4.1–4.5	-2.4883	0.0191	0.2858	FALSE
broodsize_total	block2.1–2.5	block5.1–5.5	-5.855	0	0	TRUE
broodsize_total	block2.1–2.5	block6.1–6.5	-6.3867	0	0	TRUE
broodsize_total	block3.1–3.5	block4.1–4.5	0.1097	0.9135	1	FALSE
broodsize_total	block3.1–3.5	block5.1–5.5	-2.5226	0.0176	0.2642	FALSE
broodsize_total	block3.1–3.5	block6.1–6.5	-3.6136	0.0012	0.0176	TRUE
broodsize_total	block4.1–4.5	block5.1–5.5	-1.9237	0.0646	0.9691	FALSE
broodsize_total	block4.1–4.5	block6.1–6.5	-2.9194	0.0069	0.1028	FALSE
broodsize_total	block5.1–5.5	block6.1–6.5	-1.4131	0.1686	1	FALSE
maleproductionrate_early	block1.1–1.5	block2.1–2.5	-0.3158	0.7545	1	FALSE
maleproductionrate_early	block1.1–1.5	block3.1–3.5	-0.1639	0.871	1	FALSE
maleproductionrate_early	block1.1–1.5	block4.1–4.5	-1.1125	0.2754	1	FALSE
maleproductionrate_early	block1.1–1.5	block5.1–5.5	0.7954	0.4331	1	FALSE
maleproductionrate_early	block1.1–1.5	block6.1–6.5	0.7473	0.4611	1	FALSE
maleproductionrate_early	block2.1–2.5	block3.1–3.5	0.0567	0.9552	1	FALSE
maleproductionrate_early	block2.1–2.5	block4.1–4.5	-1.0084	0.3219	1	FALSE
maleproductionrate_early	block2.1–2.5	block5.1–5.5	1.1611	0.2554	1	FALSE
maleproductionrate_early	block2.1–2.5	block6.1–6.5	1.1087	0.277	1	FALSE
maleproductionrate_early	block3.1–3.5	block4.1–4.5	-0.9828	0.3341	1	FALSE
maleproductionrate_early	block3.1–3.5	block5.1–5.5	0.6624	0.5131	1	FALSE
maleproductionrate_early	block3.1–3.5	block6.1–6.5	0.6369	0.5293	1	FALSE
maleproductionrate_early	block4.1–4.5	block5.1–5.5	1.3404	0.1909	1	FALSE
maleproductionrate_early	block4.1–4.5	block6.1–6.5	1.3296	0.1944	1	FALSE
maleproductionrate_early	block5.1–5.5	block6.1–6.5	-0.0495	0.9608	1	FALSE
maleproductionrate_late	block1.1–1.5	block2.1–2.5	-0.0847	0.9331	1	FALSE
maleproductionrate_late	block1.1–1.5	block3.1–3.5	0.2927	0.7719	1	FALSE
maleproductionrate_late	block1.1–1.5	block4.1–4.5	-0.8936	0.3791	1	FALSE
maleproductionrate_late	block1.1–1.5	block5.1–5.5	0.3939	0.6966	1	FALSE
maleproductionrate_late	block1.1–1.5	block6.1–6.5	0.1548	0.8781	1	FALSE
maleproductionrate_late	block2.1–2.5	block3.1–3.5	0.4439	0.6606	1	FALSE
maleproductionrate_late	block2.1–2.5	block4.1–4.5	-0.8769	0.388	1	FALSE
maleproductionrate_late	block2.1–2.5	block5.1–5.5	0.5724	0.5716	1	FALSE
maleproductionrate_late	block2.1–2.5	block6.1–6.5	0.2882	0.7753	1	FALSE
maleproductionrate_late	block3.1–3.5	block4.1–4.5	-1.0081	0.3221	1	FALSE
maleproductionrate_late	block3.1–3.5	block5.1–5.5	0.1162	0.9083	1	FALSE
maleproductionrate_late	block3.1–3.5	block6.1–6.5	-0.1837	0.8556	1	FALSE
maleproductionrate_late	block4.1–4.5	block5.1–5.5	1.0409	0.3068	1	FALSE
maleproductionrate_late	block4.1–4.5	block6.1–6.5	0.9636	0.3435	1	FALSE
maleproductionrate_late	block5.1–5.5	block6.1–6.5	-0.316	0.7543	1	FALSE
maleproductionrate_total	block1.1–1.5	block2.1–2.5	-0.3856	0.7027	1	FALSE
maleproductionrate_total	block1.1–1.5	block3.1–3.5	0.2022	0.8413	1	FALSE
maleproductionrate_total	block1.1–1.5	block4.1–4.5	-1.0263	0.3135	1	FALSE
maleproductionrate_total	block1.1–1.5	block5.1–5.5	0.7948	0.4334	1	FALSE
maleproductionrate_total	block1.1–1.5	block6.1–6.5	0.6062	0.5493	1	FALSE
maleproductionrate_total	block2.1–2.5	block3.1–3.5	0.5757	0.5694	1	FALSE
maleproductionrate_total	block2.1–2.5	block4.1–4.5	-0.9148	0.3681	1	FALSE
maleproductionrate_total	block2.1–2.5	block5.1–5.5	1.2196	0.2328	1	FALSE
maleproductionrate_total	block2.1–2.5	block6.1–6.5	1.0634	0.2967	1	FALSE
maleproductionrate_total	block3.1–3.5	block4.1–4.5	-1.0828	0.2881	1	FALSE
maleproductionrate_total	block3.1–3.5	block5.1–5.5	0.5402	0.5933	1	FALSE
maleproductionrate_total	block3.1–3.5	block6.1–6.5	0.3395	0.7368	1	FALSE
maleproductionrate_total	block4.1–4.5	block5.1–5.5	1.236	0.2267	1	FALSE
maleproductionrate_total	block4.1–4.5	block6.1–6.5	1.183	0.2468	1	FALSE
maleproductionrate_total	block5.1–5.5	block6.1–6.5	-0.3029	0.7642	1	FALSE
