# Supplementary material for: Natural variation in reproductive timing and X-chromosome nondisjunction in Caenorhabditis elegans
Source: G3 (Bethesda). 2021 Sep 22;11(12):jkab327. doi: 10.1093/g3journal/jkab327 (PMC8664432; doi:10.1093/g3journal/jkab327)
Supplement: jkab327_Supplementary_Data [file jkab327_supplementary_data.zip › GENETICS-G3-2021-402755-s07.xlsx]

## Sheet: pearsonr_w_p-value
trat1	trait2	pearsonr	p-value
early_broodsize	late_broodsize	-0.00168723	0.987194
early_broodsize	total_broodsize	0.569538	2.55918e-09	***
early_broodsize	change_broodsize	-0.408627	4.7751e-05	***
early_broodsize	early_maleproductionrate	-0.148457	0.155554
early_broodsize	late_maleproductionrate	0.0857567	0.41374
early_broodsize	total_maleproductionrate	-0.0597934	0.569127
early_broodsize	change_maleproductionrate	0.0647067	0.537752
late_broodsize	total_broodsize	0.821003	7.13346e-24	***
late_broodsize	change_broodsize	0.895847	8.16464e-34	***
late_broodsize	early_maleproductionrate	-0.311576	0.00236463	**
late_broodsize	late_maleproductionrate	-0.286226	0.00541289	**
late_broodsize	total_maleproductionrate	-0.254142	0.0139628	*
late_broodsize	change_maleproductionrate	-0.0304944	0.771688
total_broodsize	change_broodsize	0.50306	2.76059e-07	***
total_broodsize	early_maleproductionrate	-0.340862	0.00082753	***
total_broodsize	late_maleproductionrate	-0.186307	0.0737639
total_broodsize	total_maleproductionrate	-0.243034	0.0189076	*
total_broodsize	change_maleproductionrate	0.0118774	0.910034
change_broodsize	early_maleproductionrate	-0.241206	0.0198514	*
change_broodsize	late_maleproductionrate	-0.2898	0.00483735	**
change_broodsize	total_maleproductionrate	-0.212122	0.0412253	*
change_broodsize	change_maleproductionrate	-0.0283408	0.787417
early_maleproductionrate	late_maleproductionrate	0.475163	1.48914e-06	***
early_maleproductionrate	total_maleproductionrate	0.839695	7.3481e-26	***
early_maleproductionrate	change_maleproductionrate	-0.542685	1.91661e-08	***
late_maleproductionrate	total_maleproductionrate	0.839004	8.79188e-26	***
late_maleproductionrate	change_maleproductionrate	0.28162	0.00624369
total_maleproductionrate	change_maleproductionrate	-0.121143	0.247382
