# Supplementary material for: Natural variation in reproductive timing and X-chromosome nondisjunction in Caenorhabditis elegans
Source: G3 (Bethesda). 2021 Sep 22;11(12):jkab327. doi: 10.1093/g3journal/jkab327 (PMC8664432; doi:10.1093/g3journal/jkab327)
Supplement: jkab327_Supplementary_Data [file jkab327_supplementary_data.zip › GENETICS-G3-2021-402755-s08.xlsx]

## Sheet: Table_S2
CHROM	POS	gene_name	gene_id	impact	late_male_spearman_cor_p	total_male_spearman_cor_p
IV	10282516	rad-51	WBGene00004297	LOW	0.0352422	0.0333619
IV	10282788	rad-51	WBGene00004297	MODIFIER	0.0316304	0.00311448
IV	10282840	rad-51	WBGene00004297	MODIFIER	0.0279121	0.0189791
IV	10548060	zim-1	WBGene00011597	MODIFIER	0.0257412	0.0229009
IV	10551413	zim-1	WBGene00011597	MODIFIER	0.023693	0.00162855
IV	10552467	zim-1	WBGene00011597	MODIFIER	0.023693	0.00162855
IV	10552593	zim-1	WBGene00011597	MODIFIER	0.0019604	0.000104
IV	10553225	zim-1	WBGene00011597	MODIFIER	0.0341188	0.00283527
IV	10553948	zim-1	WBGene00011597	MODIFIER	0.0352422	0.0333619
IV	10555007	zim-1	WBGene00011597	LOW	0.0352422	0.0333619
IV	10555321	zim-2	WBGene00011600	MODIFIER	0.00188724	0.000103
IV	10555524	zim-2	WBGene00011600	MODIFIER	0.0352422	0.0333619
IV	10556789	zim-2	WBGene00011600	MODIFIER	0.00188724	0.000103
IV	10557100	zim-2	WBGene00011600	MODERATE	0.0295735	0.00226931
IV	10557114	zim-2	WBGene00011600	MODERATE	0.0295735	0.00226931
IV	10557189	zim-2	WBGene00011600	MODIFIER	0.00188724	0.000103
IV	10557209	zim-2	WBGene00011600	MODIFIER	0.0295735	0.00226931
IV	10557342	zim-2	WBGene00011600	MODERATE	0.00188724	0.000103
IV	10558022	zim-2	WBGene00011600	HIGH	0.00188724	0.000103
IV	10559496	zim-3	WBGene00011601	MODERATE	0.0295735	0.00226931
IV	10559575	zim-3	WBGene00011601	LOW	0.00188724	0.000103
IV	10559590	zim-3	WBGene00011601	LOW	0.00188724	0.000103
IV	10559793	zim-3	WBGene00011601	MODERATE	0.0295735	0.00226931
IV	10560163	zim-3	WBGene00011601	LOW	0.0295735	0.00226931
IV	10560369	zim-3	WBGene00011601	LOW	0.00188724	0.000103
IV	10560434	zim-3	WBGene00011601	LOW	0.0295735	0.00226931
IV	10560744	zim-3	WBGene00011601	LOW	0.0295735	0.00226931
IV	10562249	him-8	WBGene00001867	MODERATE	0.00188724	0.000103
IV	10562422	him-8	WBGene00001867	MODIFIER	0.0295735	0.00226931
IV	10562643	him-8	WBGene00001867	MODIFIER	0.00188724	0.000103
IV	10562769	him-8	WBGene00001867	MODIFIER	0.00188724	0.000103
IV	10563322	him-8	WBGene00001867	MODERATE	0.005182	0.000349
IV	10563493	him-8	WBGene00001867	MODERATE	0.00188724	0.000103
IV	10563612	him-8	WBGene00001867	MODIFIER	0.0295735	0.00226931
IV	10563897	him-8	WBGene00001867	MODIFIER	0.00188724	0.000103
IV	11573540	srgp-1	WBGene00006406	MODIFIER	0.0352422	0.0333619
IV	11578665	srgp-1	WBGene00006406	MODIFIER	0.0302731	0.0253909
IV	12083201	lex-1	WBGene00008682	LOW	0.0352422	0.0333619
IV	12083232	lex-1	WBGene00008682	MODERATE	0.0352422	0.0333619
IV	12083827	lex-1	WBGene00008682	MODIFIER	0.0352422	0.0333619
IV	12084139	lex-1	WBGene00008682	MODIFIER	0.0447279	0.00412085
V	13176908	him-17	WBGene00001874	MODIFIER	0.0352137	0.0163004
V	13178557	him-17	WBGene00001874	LOW	0.0352137	0.0163004
V	13964693	sao-1	WBGene00011195	MODIFIER	0.0239524	0.00413906
V	14090774	him-5	WBGene00001864	MODIFIER	0.00371779	0.00213871
V	14090957	him-5	WBGene00001864	MODIFIER	0.0127774	0.00128471
V	14091464	him-5	WBGene00001864	LOW	0.00371779	0.00213871
V	14092357	him-5	WBGene00001864	MODIFIER	0.00692003	0.000549
V	14457568	coh-3	WBGene00000592	MODIFIER	0.032259	0.00462341
V	14458395	coh-3	WBGene00000592	LOW	0.032259	0.00462341
