# Supplementary material for: Natural variation in reproductive timing and X-chromosome nondisjunction in Caenorhabditis elegans
Source: G3 (Bethesda). 2021 Sep 22;11(12):jkab327. doi: 10.1093/g3journal/jkab327 (PMC8664432; doi:10.1093/g3journal/jkab327)
Supplement: jkab327_Supplementary_Data [file jkab327_supplementary_data.zip › GENETICS-G3-2021-402755-s09.xlsx]

## Sheet: Table_S3
CHROM	POS	gene_name	gene_id	impact	late_male_spearman_cor_p	total_male_spearman_cor_p
IV	9139368	daf-10	WBGene00000906	MODIFIER	0.0361206	0.0341799
IV	9139704	daf-10	WBGene00000906	MODIFIER	0.0361206	0.0341799
IV	9140529	daf-10	WBGene00000906	MODIFIER	0.0361206	0.0341799
IV	9140854	daf-10	WBGene00000906	MODIFIER	0.0361206	0.0341799
IV	9142990	daf-10	WBGene00000906	MODIFIER	0.0361206	0.0341799
IV	9143168	daf-10	WBGene00000906	MODIFIER	0.0361206	0.0341799
IV	9144386	daf-10	WBGene00000906	MODIFIER	0.0361206	0.0341799
IV	9144938	daf-10	WBGene00000906	MODIFIER	0.0361206	0.0341799
IV	9143367	daf-10	WBGene00000906	MODERATE	0.0361206	0.0341799
IV	9316845	rpn-7	WBGene00004463	MODERATE	0.0352422	0.0333619
IV	9446650	hsp-12.6	WBGene00002013	MODIFIER	0.0352422	0.0333619
IV	9527139	elo-1	WBGene00001239	LOW	0.0317968	0.0299746
IV	9799632	fat-4	WBGene00001396	MODIFIER	0.0352422	0.0333619
IV	9804049	fat-3	WBGene00001395	MODIFIER	0.0352422	0.0333619
IV	9804677	fat-3	WBGene00001395	MODERATE	0.0352422	0.0333619
IV	9805637	fat-3	WBGene00001395	MODIFIER	0.0361206	0.0341799
IV	10143034	gst-4	WBGene00001752	MODIFIER	0.0203577	0.00368446
IV	10255550	daf-14	WBGene00000910	LOW	0.0316304	0.00311448
IV	10251733	daf-14	WBGene00000910	MODIFIER	0.0487578	0.01026
IV	10252780	daf-14	WBGene00000910	MODIFIER	0.0487578	0.01026
IV	10253202	daf-14	WBGene00000910	MODIFIER	0.0487578	0.01026
IV	10253308	daf-14	WBGene00000910	MODIFIER	0.0487578	0.01026
IV	10253455	daf-14	WBGene00000910	MODIFIER	0.0487578	0.01026
IV	10254045	daf-14	WBGene00000910	MODIFIER	0.0487578	0.01026
IV	10255494	daf-14	WBGene00000910	MODIFIER	0.0487578	0.01026
IV	10254220	daf-14	WBGene00000910	MODERATE	0.0487578	0.01026
IV	10254950	daf-14	WBGene00000910	LOW	0.0487578	0.01026
IV	10673908	epi-1	WBGene00001328	LOW	0.00012	4.29e-05
IV	10676230	epi-1	WBGene00001328	LOW	0.00349543	0.0011447
IV	10667075	epi-1	WBGene00001328	MODIFIER	0.004113	0.000143
IV	10678435	epi-1	WBGene00001328	MODERATE	0.0352422	0.0333619
IV	11526816	mep-1	WBGene00003218	MODERATE	0.0292541	0.0275756
IV	11689030	let-60	WBGene00002335	MODIFIER	0.00645231	0.00614061
IV	11820643	par-5	WBGene00003920	MODIFIER	0.0352422	0.0333619
IV	11891050	let-653	WBGene00002827	MODIFIER	0.0352422	0.0333619
IV	11887317	let-653	WBGene00002827	MODIFIER	0.0352422	0.0333619
IV	11887539	let-653	WBGene00002827	MODIFIER	0.0352422	0.0333619
IV	11889901	let-653	WBGene00002827	MODIFIER	0.0352422	0.0333619
IV	11889902	let-653	WBGene00002827	MODIFIER	0.0352422	0.0333619
IV	11889903	let-653	WBGene00002827	MODIFIER	0.0352422	0.0333619
IV	11886524	let-653	WBGene00002827	MODERATE	0.0352422	0.0333619
IV	11889585	let-653	WBGene00002827	MODERATE	0.0352422	0.0333619
IV	11890237	let-653	WBGene00002827	LOW	0.0352422	0.0333619
IV	11890727	let-653	WBGene00002827	LOW	0.0352422	0.0333619
V	12785819	fkb-4	WBGene00001429	MODIFIER	0.0418141	0.0264507
V	12786048	fkb-4	WBGene00001429	MODIFIER	0.0418141	0.0264507
V	13433220	mes-4	WBGene00003222	MODIFIER	0.0244885	0.00625725
V	13433895	mes-4	WBGene00003222	MODIFIER	0.0244885	0.00625725
V	14018657	mtl-2	WBGene00003474	MODIFIER	0.00152994	9.46e-05
V	18912750	cyp-42A1	WBGene00013585	MODIFIER	0.00979497	0.00858679
V	18912506	cyp-42A1	WBGene00013585	MODIFIER	0.0178923	0.0261721
V	18912770	cyp-42A1	WBGene00013585	MODIFIER	0.0189595	0.0266397
